# Supplementary material for: Rainfall pattern greatly affects water use by Mongolian Scots pine on a sandy soil, in a semi-arid climate
Source: Copernicus journal article supplement (doi:10.5194/bg-2017-69), 2017-03-13
Supplement: Supplementary file [file bg-2017-69-AC2-supplement.pdf]

# 1 Severe drought greatly reduces sap flow of Mongolian Scots pine (*Pinus sylvestris* var. *mongolica*) and its recovery ability in a sandy and 2 semi-arid environment 3

4 HongZhong DANG<sup>1,a</sup>, LiZhen ZHANG<sup>2</sup>, WenBin YANG<sup>1</sup>, JinChao FENG<sup>1</sup>, Hui HAN<sup>3</sup>, Wei LI<sup>1</sup>

5 <sup>1</sup> Institute of Desertification Studies, Chinese Academy of Forestry, Beijing, 100091, China

6 <sup>2</sup> Institute of Resources and Environment, China Agricultural University, Beijing, 100094, China

7 <sup>3</sup> Institute of Sand Fixation and Afforestation of Liaoning Province, Fuxin, 123000, China

8 <sup>a</sup> Correspondence to: HongZhong DANG ([hzdang@caf.ac.cn](mailto:hzdang@caf.ac.cn))

9  
10 **Abstract.** Trees growing in water limited ecosystems are often exposed to the significant challenges of soil water stress due  
11 to low precipitation and high variation. In this study, we aimed to quantify the water use of Mongolian Scots pine (*Pinus*  
12 *sylyvestris* var. *mongolica*) growing on a sandy soil, in a region characterised by an erratic rainfall pattern. Measurements were  
13 made over three successive years of contrasting annual rainfall - a wet year (2013), a dry year (2014), and a second dry year  
14 (2015). Over the three years, sap flux density ( $J_s$ ) was measured at individual tree level for 25 tree samples, and were up-scaled  
15 to estimate tree transpiration at plot level ( $T_s$ ). Due to the high variation of rainfall in three years, the measurements reflected  
16 the tree response to wide range of water stress from wet (2013), mild-drought (2014) to severe-drought (2015). The daily  
17 transpiration  $T_s$  of trees during growing seasons was 3.7 mm day<sup>-1</sup> in 2013, 2.6 mm day<sup>-1</sup> in 2014, but sharply decreased to 1.4  
18 mm day<sup>-1</sup> in 2015 after a long-period drought stress, resulting a large difference in total annual stand transpiration as 357 mm  
19 in 2013, 268 mm in 2014 and 149 mm in 2015. Under a long-period of drought stress in late season in 2014 and early season  
20 in 2015, the recovery of  $T_s$  was incomplete (63–69%). The erratic rainfall and sandy soil coupling with a declining groundwater  
21 table, tree water use fluctuated widely over quite short time scales (months or weeks). Our results help elucidate the interplay  
22 between the effects of the atmosphere and soil moisture on tree water use, and highlight the negative effects of drought on  
23 water use of mature forest tree. Our findings provide the evidence for the observed premature degradation of these Mongolian

24 Scots pine plantations in terms of an eco-hydrological perspective.

25 **Keywords:** sap flux; Mongolian Scots pine (*Pinus sylvestris* var. *mongolica* Litv); soil water availability; water stress; sandy  
26 soils; semi-arid climate.

27

28 **1 Introduction**

29 Reforestation has been used widely in semi-arid areas to control soil erosion, to capture carbon and to serve as wind breaks  
30 (D'Odorico and Porporato, 2006). However, trees growing in severely water-limited ecosystems are often exposed to signifi-  
31 cant challenge due to insufficient soil water (Wesche et al., 2011; Su et al., 2014). Many factors influence the amount of soil  
32 water and its availability to vegetation, for instance, the amounts and timings of rainfall interval, soil water capacity, root  
33 water-uptake capacity and the availability of alternative water sources such as groundwater (Meinzer et al., 2006). Under  
34 climate change, the increasing in the frequency and severity of drought decreases soil water availability in the future (Leo et  
35 al., 2013). This would increase tree mortality rate through excessive competition for water and thus influences the structure  
36 and function of forest ecosystems (Barbeta et al., 2015). Quantification of water use by trees at individual and forest levels  
37 could help us to understand how environmental factors affect their water usage. It is necessary to properly assess the impacts  
38 of climate change on ecological and hydrological processes in these fragile ecosystems (Bovard et al., 2005). These knowledge  
39 would allow us to make better forest establishment decisions and management actions.

40 Mongolian Scots pine (*Pinus sylvestris* var. *mongolica*, MP), a geographical variety of Scots pine (*P. sylvestris*), is natu-  
41 rally widely distributed in northern China and in parts of Russia and Mongolia. It is found in the Daxinganling Mountains  
42 (50°10'–53°33' N, 121°11'–127°10' E) and in Honghuaerji on the Hulun Buir sandy plains of the northeast (Zhu et al., 2008;  
43 Zheng et al., 2012). The MP is a popular species for reforestation in northern China due to its traits of good drought and cold  
44 resistance. Consequently, more than  $6.7 \times 10^5$  ha of MP plantations have been established to control desertification, in the great  
45 project of the Three-North Shelter Forest Program (TNSFP) launched in China from 1978 (Zheng et al., 2012). Unfortunately,  
46 serious degradation and considerable concern has occurred in these plantations since the mid-1990s, such as poor tree health  
47 and numerous tree death, particularly on the sandy soils in southern Horqin (42°43' N, 122°22' E, our study area) (Jiao, 2001;  
48 Zhu et al., 2008) (**Fig. 1**).

49

50

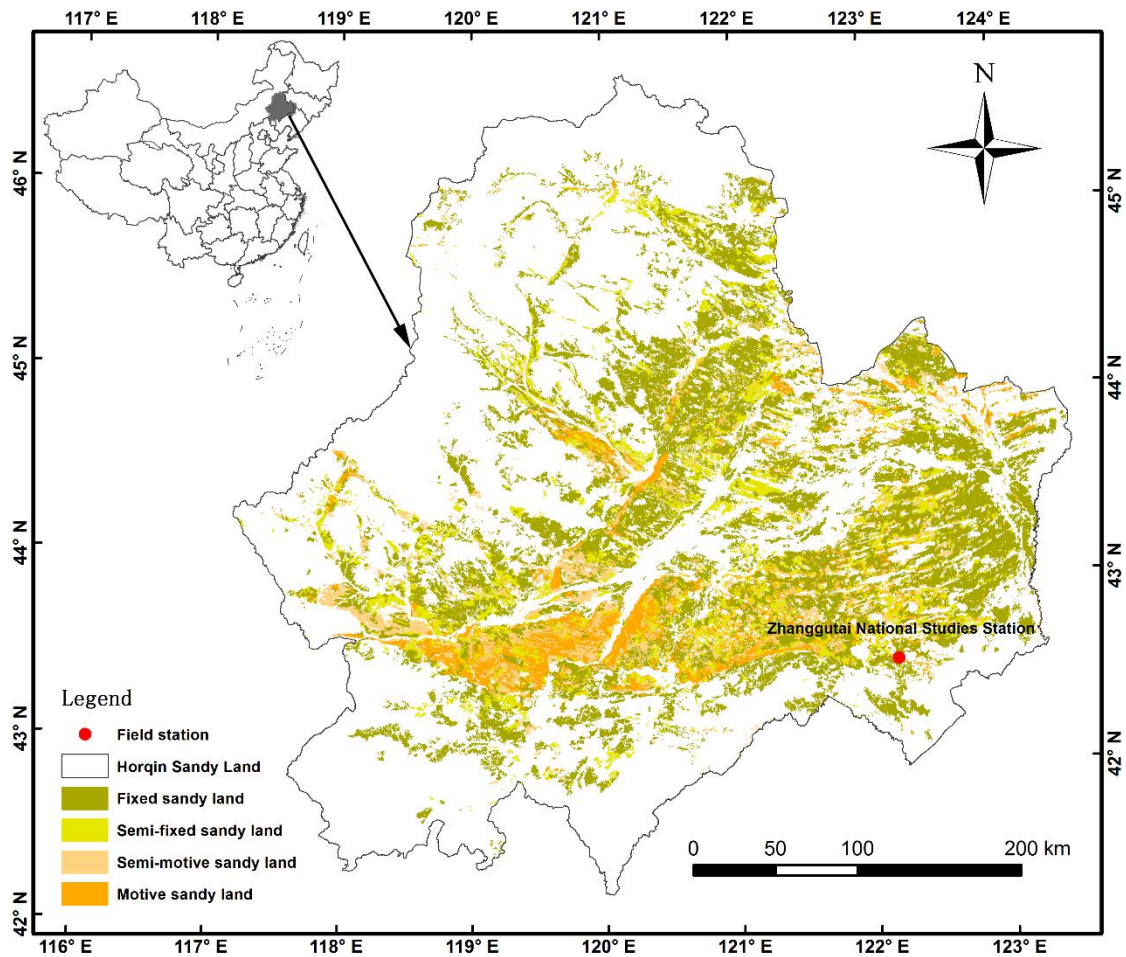

51 **Figure 1** Location and environment of Horqin region in Liaoning province, China (study area)

52 A key driver for the degradation in water-limited ecosystems is regional low and erratic precipitation, which reduces soil  
 53 water availability (Mereu et al., 2009). In semi-arid southern Horqin, three main soil-water related factors causes the degrada-  
 54 tion, i.e. the high inter-annual variation in precipitation, the high intra-seasonal variability in precipitation and the declining  
 55 groundwater table. The forest's sensitivity to drought is highly species-specific, climate-specific and site-specific. However, it  
 56 remains unclear how, and to what extent, these three factors are responsible for the degradation recorded in this region.

57 In general, plants native to arid and semi-arid environments have developed a wide range of water-use strategies to cope  
 58 with drought, e.g. by 'water saver' plants to avoid drought by minimizing transpiration with limiting leaf area growth, or by  
 59 defoliation and stomatal closure (Levitt, 1980; Gartner et al., 2009; Chirino et al., 2011). The MP is a shallow-rooted species  
 60 and more than 85 % of roots system grows in the upper 0.4 m soil layer. The root density is sharply decreased below 1.0 m  
 61 soil depth (Su et al., 2006).

62 We hypothesize that on the long-period drought in semi-arid sandy environment raising from the high variation of pre-  
 63 cipitation and low water holding capacity is the major reason causing the degradation of forest. The aims of this study were:  
 64 (1) to quantify daily water use of MP based on sap-flux measurements in relation to the three contrasting precipitation years;  
 65 (2) to determine the relationships between  $J_s$  and the main meteorological variables and soil water availability over the ex-  
 66 tended (three-year) period; (3) to explore the effect of the severity of the drought stress over number of cycles of soil wetting  
 67 and drying on daily water use and recovery ability.

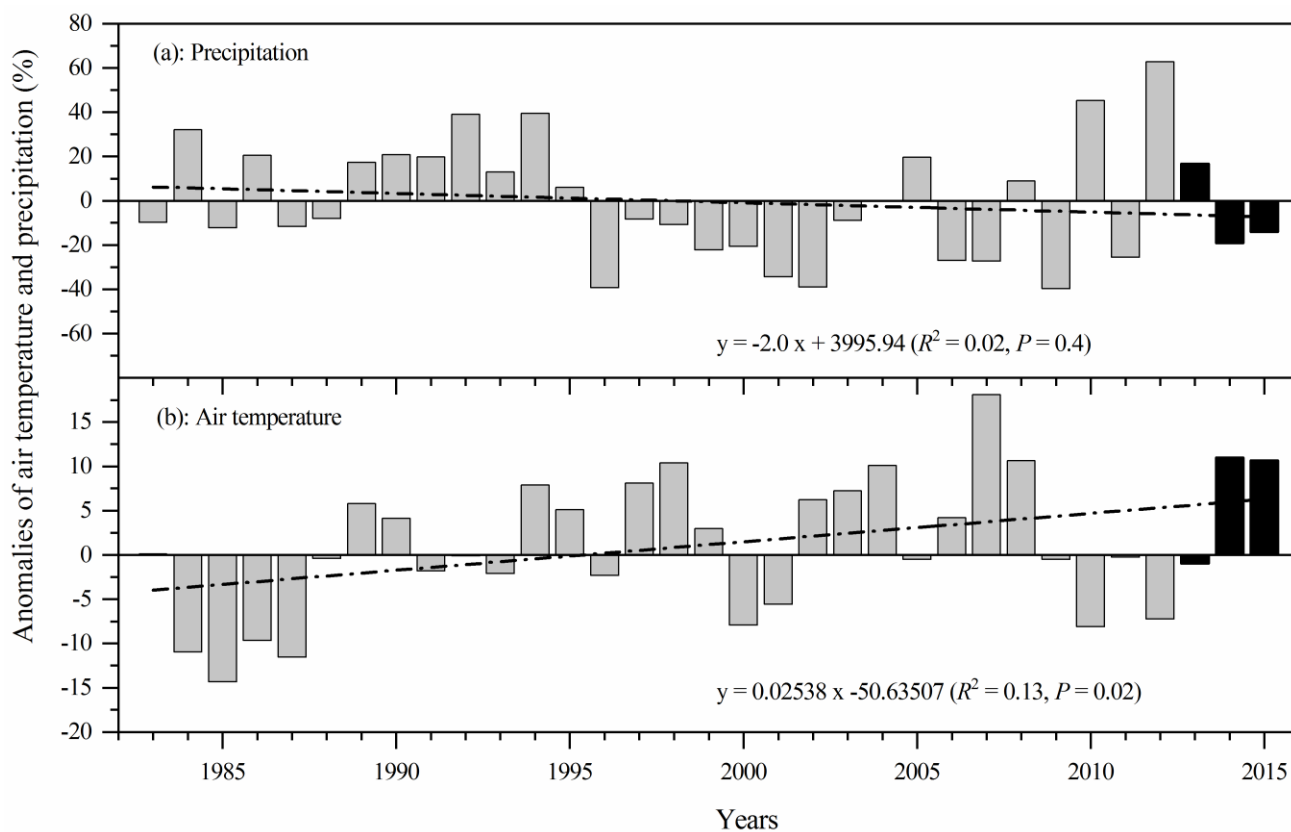

68 **Figure 2** Annual variations of precipitation (a), mean air temperature (b) at Zhanggutai. Grey color indicates the data before the experiment  
 69 (1983-2012) and black for the years of experiments (2013-2015). The dashed lines indicate the linear regressions over the whole period.

70

## 71 2 Materials and methods

### 72 2.1 Site description

73 The trial was carried out at the Zhanggutai National Desertification Control Trial Station located at the southern edge of the  
 74 Horqin region in Liaoning province, China (122° 22' E, 42° 43' N, at 226.5 m a.s.l.) (**Fig. 1**). The experiment was conducted in

75 a 40 ha plantation with 35-year old MP. Tree density was 625 trees per ha. Management interventions and other human dis-  
76 turbances were limited by the installation of a secure fence around the experiment field. The site has a semi-arid, continental  
77 climate with a mean annual temperature of 7.9 °C, a frost-free period of 150–160 days per year, a mean annual evaporation of  
78 1553 mm and a long-term annual mean precipitation of 475 mm ( $P_{ave}$ ) over the last 30 years (1983–2012) with coefficient of  
79 variance of 0.27 (Zhu et al., 2005). Over the long period, there have been a number of consecutive dry years. For instance,  
80 annual precipitation between 1996 and 2004 were below  $P_{ave}$  (**Fig. 2a**). Usually, about 60 to 70 % of annual rainfall occurs in  
81 the three months from June to August. The value of annual temperature over the last 30 years was increased slightly at a rate  
82 of 0.03 °C yr<sup>-1</sup> (**Fig. 2b**), while annual precipitation was slightly decreased with a rate of 2.0 mm yr<sup>-1</sup> (**Fig. 2a**). The soil is  
83 sandy with a sedimentary aeolian sand layer more than 3 m and an ancient alluvial sand layer with the total depth more than  
84 126 m (Jiao, 1989). The mean bulk density of the upper 2 m soil layer is 1.61 g cm<sup>-3</sup>. The mean soil texture is 83 % of sand (>  
85 0.05 mm), 9 % of silt (0.05–0.002 mm) and 8 % of clay (< 0.002 mm). The organic matter content is 0.3–1.0 g kg<sup>-1</sup>. The  
86 understory plant species in the forestry are *Acer pictum* subsp. *mono* Maxim, *Crataegus pinnatifida* var. *major* N. E. Brown.,  
87 *Lespedeza bicolor* Turcz., *Artemisia halodendron* Turcz et Bess., *Cleistogenes chinensis* Maxim.

## 88 **2.2 Experimental design and samplings**

89 To break the prevailing northerly winds, the MP were planted in a square-grid pattern with 4 m for both row spacing and plant  
90 distance. Total area of experiment was 400 m<sup>2</sup> (20×20 m) containing 25 trees. All trees in the area were planted at same year  
91 in sole system surrounded by a wire fence (**Fig. 3**). The growth of trees in the experiment was normal in 2013, however, the  
92 leaves of trees in 2015 turned to grey slightly. The obvious defoliation or death did not occurred in 2015. Sap flow sensors  
93 were installed in each tree (totally 25 trees) in experimental area in 2013. Due to the damage of sensors, 22 left in 2014 and 13  
94 left in 2015. The characteristics of the sampled trees are shown in **Table 1**. Diameters at breast height (DBH) were measured  
95 with a diameter tape and tree height with an altimeter. The thickness of bark, sapwood and heartwood were measured by  
96 sampling core with a Pressler increment borer at breast height. Thickness measurements were made with a Vernier caliper with  
97 tissue boundaries identified based on color. In our Mongolian Scots pine, the sapwood colour was yellow-white and that of the

98 heartwood was tan. A few drops of methyl orange solution helped define the interface where the boundary was indistinct. The  
 99 DBH, tree height and sapwood areas of the sampled trees in 2013, 2014 and 2015 were not significantly different ( $P > 0.05$ ),  
 100 indicating a good uniformity of testing trees.

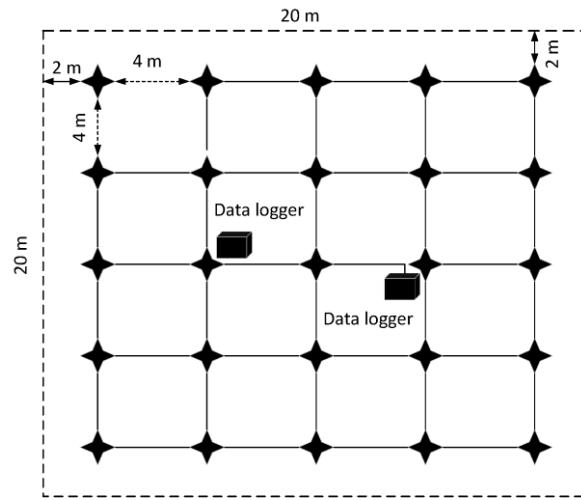

107 **Figure 3** Sketch map of 25 sample trees (stars) planted in a 4x4 m spaced square grid of about 400 m<sup>2</sup> (dashed line is border fence). Tree  
 108 ages were identical and tree sizes were similar. The number of instrumented trees decreased in 2014, and again 2015. Details of  
 109 samples see **Table 1**.

111 **Table 1** Diameter at breast height (DBH, cm), tree height ( $H$ , m), height of first live branch ( $H_b$ , m), 1<sup>st</sup> quartile of DBH ( $Q_1$ ),  
 112 3<sup>rd</sup> quartile of DBH ( $Q_3$ ), sapwood width (SW, cm), sapwood area ( $A_s$ , cm<sup>2</sup>) in 2013 to 2015. The mean values and standard  
 113 deviations (S.D.) were given, the  $n$  is the number of sampling trees.

| Year              | DBH (cm)        |       |       | $H$ (cm)       | $H_b$ (cm)    | SW (cm)       | $A_s$ (cm <sup>2</sup> ) |
|-------------------|-----------------|-------|-------|----------------|---------------|---------------|--------------------------|
|                   | mean $\pm$ S.D. | $Q_1$ | $Q_3$ |                |               |               |                          |
| 2013 ( $n = 25$ ) | 18.0 $\pm$ 2.7  | 16.1  | 18.9  | 10.3 $\pm$ 0.7 | 4.5 $\pm$ 1.1 | 5.5 $\pm$ 0.6 | 203 $\pm$ 58.6           |
| 2014 ( $n = 22$ ) | 17.1 $\pm$ 2.1  | 15.6  | 18.7  | 9.3 $\pm$ 0.8  | 3.7 $\pm$ 0.5 | 5.3 $\pm$ 0.5 | 182 $\pm$ 42.0           |
| 2015 ( $n = 13$ ) | 17.7 $\pm$ 2.2  | 17.2  | 18.8  | 9.1 $\pm$ 0.8  | 3.7 $\pm$ 0.3 | 5.4 $\pm$ 0.5 | 189 $\pm$ 52.3           |

114

## 115 2.3 Measurements

### 116 2.3.1 Micrometeorological variables

117 Micrometeorological variables including solar radiation ( $R_s$ ), net radiation ( $R_n$ ), air temperature ( $T_a$ ), relative humidity (RH),  
118 wind speed ( $W_s$ ) and rainfall ( $R$ ) were measured using an automatic weather station (AR5, Avalon Scientific, Inc. USA) lo-  
119 cated about 50 m away from the experimental field. All sensors were installed 2.0 m above the ground except the rain gauge,  
120 which was 0.5 m above the ground. Variables were measured at 1 min intervals, averaged and recorded per hour. Reference  
121 evapotranspiration ( $ET_0$ ) was calculated using the FAO Penman-Monteith equation based on the variables  $R_n$ ,  $T_a$ , RH and  $W_s$   
122 (Allen et al., 1998) at hourly base (Eq. (1)). Daily  $ET_0$  was summed from hourly  $ET_0$  for a day.

$$123 \quad ET_0 = \frac{0.408(R_n - G) + \gamma \frac{900}{T_a + 273} u_2 (e_s - e_a)}{\Delta + \gamma(1 + 0.34u_2)} \quad (1)$$

124 where  $ET_0$  = reference evapotranspiration ( $\text{mm h}^{-1}$ ),

125  $\Delta$  = slope of saturated water vapour pressure against air temperature  $T_a$  ( $\text{kPa } ^\circ\text{C}^{-1}$ ),

126  $R_n$  = net radiation ( $\text{MJ m}^{-2}$ ),

127  $G$  = soil heat flux ( $\text{MJ m}^{-2}$ ),

128  $\gamma$  = the psychrometric constant ( $\text{kPa } ^\circ\text{C}^{-1}$ ),

129  $e_s$  = saturated vapour pressure (kPa),

130  $e_a$  = actual vapour pressure (kPa), and

131  $u_2$  = mean wind speed at 2 m height ( $\text{m s}^{-1}$ ).

132 The value of vapor pressure deficit ( $D$ , kPa) was calculated using the following formula (Campbell and Norman, 1998):

$$133 \quad D = 0.611 \exp\left(\frac{17.502T_a}{T_a + 240.97}\right) (1 - \text{RH}) \quad (2)$$

### 134 2.3.2 Soil moisture content and groundwater table

135 Volumetric soil moisture contents ( $\theta$ , %) were measured at depths of 0.1, 0.2, 0.4, 0.6, 0.9, 1.2, 1.6 and 2.0 m using ECH<sub>2</sub>O

136 EC-5 sensors (Decagon Devices Inc., USA). Three placements in experiment area were measured. Each placement was set



137 between four neighborhood sample trees. Measurements were done at 10 min intervals with hourly means recorded by a  
 138 SQ2020 data logger (Grant Instruments Ltd, UK). The sensors was calibrated using a site-specific equation based on the  
 139 oven-drying method (Eq. (3)):

$$140 \quad \theta = 0.9677\theta_s + 0.2635 \quad (R^2 = 0.96, n = 194, \text{RMSE} = 0.41) \quad (3)$$

141 where  $\theta_s$  are the output of the sensors;  $\theta$  is the calibrated soil moisture content at each depth and placement. The mean  $\theta$   
 142 within a certain soil layer was weight-averaged based on the depth of sensor installation. The mean field capacity ( $\theta_f$ ) in 0-1  
 143 m soil layer of testing soil is 18.0 % by field observation. The minimum soil moisture content ( $\theta_{min}$ ) measured during three  
 144 years was 2.3 %. Relative extractable water (REW) in the upper 1.0 m soil layer was calculated using Eq. (4) (Granier,  
 145 1987).

$$146 \quad \text{REW} = \frac{\bar{\theta}_{0-1.0 \text{ m}} - \theta_{min}}{\theta_f - \theta_{min}} \quad (4)$$

147 The more specific classification to quantify the degree of drought at our site is defined in **Table 2**.

148 Groundwater table ( $g_w$ ) was monitored *in situ* manually once per month using a measuring tape with a cone.

149 **Table 2** Classification of soil drought based on relative extractable water (REW) from the measurements and preliminary  
 150 reports in Mongolian Scots pine. The  $T_r$  indicates transpiration rate,  $C_s$  for stomatal conductance and  $C_i$  for intercellular carbon  
 151 oxide concentration.

| Parameter | Volumetric soil<br>moisture content (%)                              | REW                              | Degree of drought | Description for bio-physiological variance                                                                                                   |
|-----------|----------------------------------------------------------------------|----------------------------------|-------------------|----------------------------------------------------------------------------------------------------------------------------------------------|
| $D_0$     | $\bar{\theta}_{0-1.0 \text{ m}} > 0.4 \theta_f$                      | $\text{REW} > 0.31$              | No drought        | Normal growth                                                                                                                                |
| $D_{mil}$ | $0.3 \theta_f \leq \bar{\theta}_{0-1.0 \text{ m}} \leq 0.4 \theta_f$ | $0.20 \leq \text{REW} \leq 0.31$ | Mild drought      | Weak growth (Jiao, 2001); $T_r$ , $C_s$ and $C_i$ decreased by 46.2 %, 33.2 % and 0.9 %, respectively (Zhu et al., 2005; Tang et al., 2015); |
| $D_{mod}$ | $0.2 \theta_f < \bar{\theta}_{0-1.0 \text{ m}} < 0.3$                | $0.08 \leq \text{REW} < 0.20$    | Moderate drought  | 30% leaves withered (Zhu et al., 2005); $T_r$ , $C_s$ and                                                                                    |

---

 $\theta_f$  $C_i$  decreased by 62.1 %, 48.6 % and 51.1 %, re-

spectively (Zhu et al., 2005; Tang et al., 2015);

 $D_s$  $\bar{\theta}_{0-1.0\text{ m}} \leq 0.2 \theta_f$ 

REW &lt; 0.08

Severely drought

Leaves withered and some of the branch die (Jiao, 2001);  $T_r$ ,  $C_s$  and  $C_i$  decreased by 70.9 %, 77.3 % and 67.6 %, respectively (Zhu et al., 2005; Tang et al., 2015)

---

### 152 2.3.3 Sap flux measurements

153 Sap flux in the outermost sapwood (0–3 cm depth) ( $J_{s\text{-outter}}$ ,  $\text{cm min}^{-1}$ ) was measured continuously using the Granier-type  
154 thermal dissipation method (Dynamax Inc., Houston. TX. USA). Each probe was installed under the cambium on the north  
155 side of the stem at breast height (1.3 m) with pairs of probes 0.04 m apart vertically. The upper probe included a heater and  
156 the lower probe was unheated and so remained at trunk temperature for reference. Each sensor was carefully removed at the  
157 end of each growing season and reinstalled next year. The temperature difference between the upper (heated) probe and the  
158 lower (reference) probe was measured at 1-min intervals, with mean values recorded at 10-min intervals using SQ2020 data  
159 loggers. The sensors were shielded with thick aluminum-faced foam to minimize warming by radiation and exposure to rain  
160 and physical damage. The Granier empirical equation for  $J_s$  was adopted as Eq. (5):

$$161 \quad J_{s\text{-outter}} = 119 \times 10^{-4} \left( \frac{\Delta T_0 - \Delta T}{\Delta T} \right)^{1.231} \quad (5)$$

162 where  $\Delta T$  is the actual temperature difference observed between heated and reference probes, and  $\Delta T_0$  is the maximum  $\Delta T$   
163 value when sap flow is close to zero (generally just predawn) determined over about 10 consecutive days (Lu et al., 2004;  
164 Dang et al., 2014).

165 Since the sap flux at inner part of sapwood (beyond 3 cm depth) ( $J_{s\text{-inner}}$ ) is low due to the relative inactivity of conductive  
166 xylem, we adopted a coefficient 0.56 (Lu et al., 2004; Nadezhdina et al., 2002) for the calibration.

167

## 168 2.3.4 Calculation of sap flow

169 Volumetric sap flow ( $\text{cm}^3 \text{h}^{-1}$ ) were the product of sap flux and corresponding sapwood area. At first, the sap flux measurements  
170  $J_s$  was converted to a daily base (Eq. (6)). The daily mean  $J_t$  for all measured trees in experiment area was then used to calculate  
171 daily transpiration ( $T_s$ ,  $\text{mm day}^{-1}$ ) of the forestry (Eq. (7)). Because all trees were at the same age and regularly-spaced, each  
172 tree was assumed to occupy equal ground per sapwood area. Hence, the ground area fraction of each tree ( $A_{g,i}$ ,  $\text{cm}^2$ ) was  
173 approximated as the product of individual sapwood area and the ratio of total stand sapwood area ( $A_{s\text{-stand}}$ ,  $\text{m}^2$ ) divided by total  
174 stand ground area ( $A_{g\text{-stand}}$ ,  $\text{m}^2$ ).

$$175 J_{t,i} = \sum_{j=1}^{24} \frac{(J_{s\text{-outter},i} \times A_{s\text{-outter},i} + J_{s\text{-inner},i} \times A_{s\text{-inner},i}) A_{s,i}}{A_{g,i}} \times 60 \quad (6)$$

$$176 T_s = \frac{1}{n} \sum_{i=1}^n J_{t,i} \quad (7)$$

177 where,

178  $J_{s\text{-outter},i}$  is the mean sap flux density in the probe-touched sapwood of a tree  $i$  and  $J_{s\text{-inner},i}$  is probe-untouched part,  $A_{s,i}$  is  
179 sapwood area of tree  $i$  ( $A_{s\text{-outter}} + A_{s\text{-inner}}$ ),  $A_{g,i}$  is ground area of a tree  $i$  weighted by sapwood area,  $J_{t,i}$  is the daily sap flow of a  
180 tree  $i$  ( $\text{mm day}^{-1}$ ),  $n$  is the numbers of trees measured each year.

## 181 2.4 Statistical analyses

182 The effect of soil moisture content on normalized transpiration ( $T_s / ET_0$ ) was tested by one-way analysis of variance  
183 (ANOVA) and a Tukey HSD *post hoc* multiple comparisons test using SPSS 20 (SPSS Inc., Chicago, IL, USA). Significant  
184 correlations between  $T_s$  or  $T_s / ET_0$  and environmental factors over different periods were determined by Pearson's correction  
185 coefficient tests at  $P < 0.05$  or  $0.01$ . The other statistical analyses and plots employed OriginPro 2016 version 9.3 (OriginLan  
186 Inc., Northampton, MA, USA).

## 187 3 Results

### 188 3.1 Seasonal dynamics of stand transpiration and environmental factors

189 The amounts of precipitation during the investigation periods were 554 mm in 2013, 384 mm in 2014 and 408 mm in 2015.

190 Rainfall was concentrated over quite short periods (**Fig. 4a**). The rainfall variation in experimental years in study region was  
191 high.

192 Daily soil moisture content exhibited large variances. The heterogeneity of soil moisture content with soil depth was  
193 significant ( $P < 0.01$ ). In a wet year 2013, soil moisture content was higher than a dry year 2014 (**Fig. 4b**). In the second dry  
194 year 2015, there was a long drought period in July and August. After a heavy rainfall in late August (232 days), the soil of  
195 both upper and deep layers were refilled with a high soil moisture content. Based on our classifications (**Table 2**), the days of  
196 moderate and severe drought ( $D_{\text{mod}} + D_s$ ) accounted for 19 %, 34 %, 66 % and 85 % of the whole three-year period for the four  
197 soil layers at 0–0.6, 0.6–1, 1–1.5 and 1.5–2 m, respectively. Thus, for MP it is the upper 1.0 m soil layer that provides the main  
198 water source, having the highest levels of soil moisture  $\bar{\theta}_{0-0.6\text{ m}}$  and  $\bar{\theta}_{0.6-1\text{ m}}$ . Intense rainfall that infiltrated to, and thus helped  
199 recharge, the deeper layers of soil ( $\bar{\theta}_{1.5-2\text{ m}}$ ) were very rare from the later July in 2013 to later August in 2015.

200 There were no significant differences between years for daily  $R_s$  ( $P = 0.4$ ) or daily mean  $D$  ( $P = 0.25$ ) (**Figs. 4c, 4d**). The  
201  $D$  over the whole period never exceeded 2.4 kPa (**Fig. 4d**). The groundwater table ( $g_w$ ) at the start of the experiment was 5.2  
202 m but significantly lowered to 5.6 m at the end of the experiment in 2015 (**Fig. 4e**).

203 The daily  $T_s$  showed similar seasonal patterns with  $R_s$  (**Fig. 4f**), indicating the radiation was a major factor to affect plant  
204 transpiration. Overall,  $T_s$  was at a relative high level in May each year until August, and then gradually decreased to a low  
205 level in late October. The seasonal dynamics of  $T_s$  reflected the variations in physiological traits of MP and meteorological  
206 factors. The  $T_s$  between the years was significantly different ( $P < 0.01$ ). The maximum daily  $T_s$  in 2013 was 3.73 mm day<sup>-1</sup>  
207 with a mean value of 1.94 mm day<sup>-1</sup> during growing season. In 2014, the maximum daily and seasonal average  $T_s$  were de-  
208 creased to 2.55 mm day<sup>-1</sup> and 1.46 mm day<sup>-1</sup>. In 2015, the great decrease of maximum  $T_s$  occurred down to a value of 1.40 mm  
209 day<sup>-1</sup>, as well as for the seasonal mean down to 0.81 mm day<sup>-1</sup> (**Fig. 4f**). The decreasing  $T_s$  between seasons was partially due  
210 to less rainfall and water availability, and probably also due to the plant recovery capability in relation to the permanent changes  
211 in plant physiological traits.

212

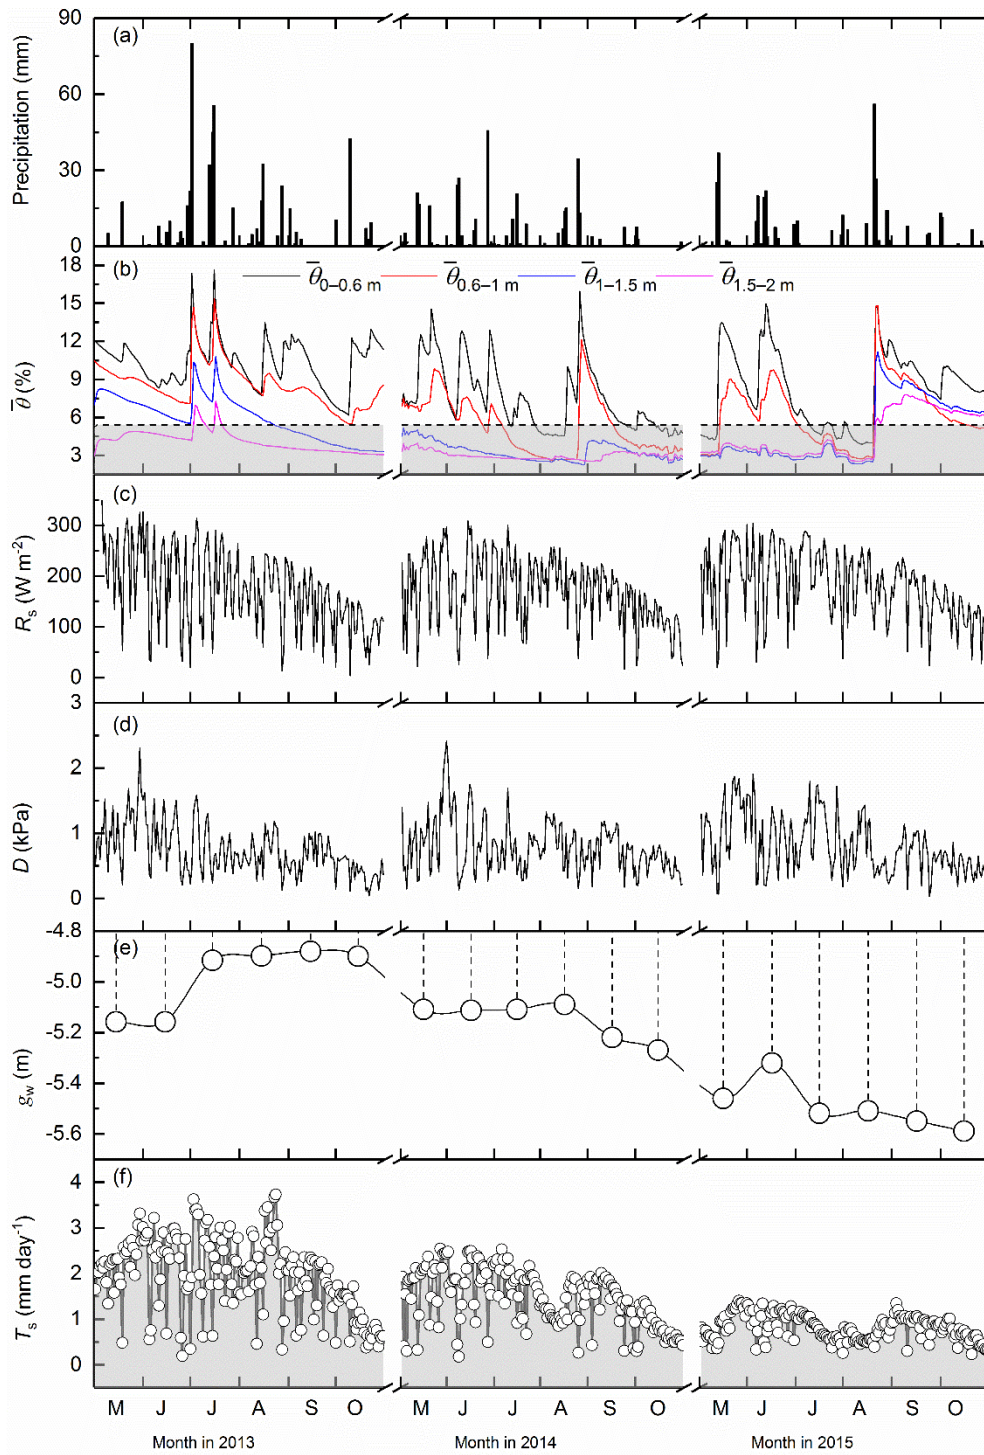

213

214 **Figure 4** Seasonal time courses of precipitation, mean volumetric soil moisture content ( $\bar{\theta}$ ), solar radiation ( $R_s$ ), vapour pressure deficit ( $D$ ),  
 215 groundwater table ( $g_w$ ), and daily mean sap flux of stands ( $T_s$ ) in 2012 to 2015. The grey area in (b) indicates moderate and severe drought.

216 **3.2 Normalized transpiration affected by soil relative extractable water**

217 The normalized transpiration  $T_s / ET_0$  under sufficient water supply  $D_0$  was about  $0.29 \pm 0.09$  (**Fig. 5a**), 15% higher than under  
 218 mild drought, 62% higher than under moderate drought and 149 % higher than under severe drought. The maximum ratio of

219 daily sap flux to reference evapotranspiration ( $T_s/ET_0$ ) increased with REW sharply at low REW but keep constant when the  
 220 REW was above 0.31 (**Fig. 5b**). This indicated that there are the other factors besides the atmospheric and soil moisture affected  
 221 the water use of MP, in which the stomatal regulation or the seasonal variation of biological rhythms is important one.

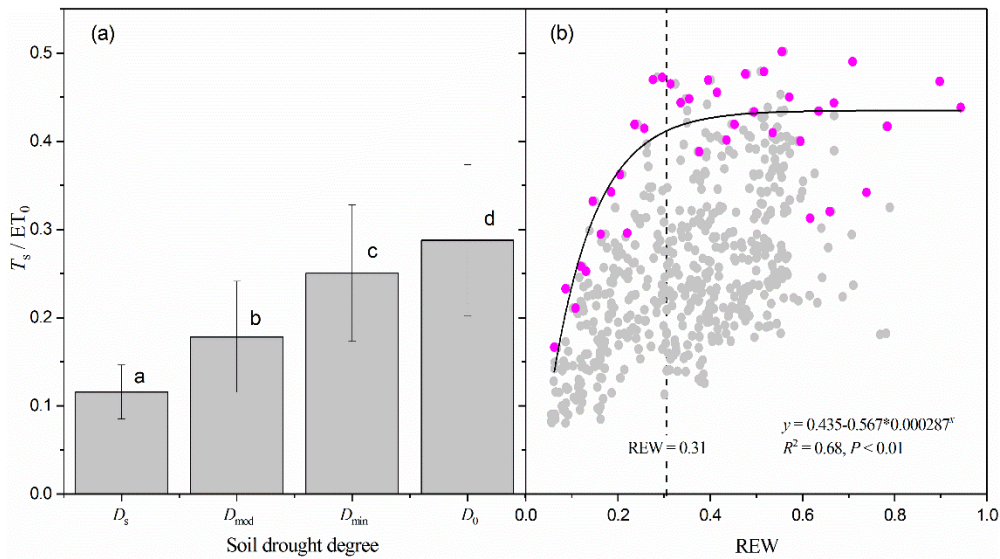

222 **Figure 5** Normalized transpiration  $T_s/ET_0$  affected by soil droughts. Normalized sap flux by using reference evapotranspiration indicates a  
 223 potential transpiration ability under maximum evaporative demand caused by metrological factors, the relationship between  $T_s/ET_0$  and  
 224 relative extractable water (REW) is mainly affected by plant traits. The maximum of  $T_s/ET_0$  at the REW step of 0.02(dimensionless) are  
 225 selected out (red circles in (b)) and modelled by an exponential function. The dashed line is at REW=0.31. Values of  $T_s/ET_0$  followed by  
 226 different letters are significantly different at  $P < 0.05$  by univariate ANOVA (post hoc Tukey HSD).

### 227 3.3 Progressive decline of sap flux with developing of drought and recovery following rain

228 The 49-day periods from DOY 203 to 251 each year was chosen to illustrate the changes in  $T_s$  with REW, a dry-wet shift. In  
 229 the period of wet year (2013), the soil moisture is always in  $D_0$  (without water stress) and mean  $T_s$  was about 2.15 mm day<sup>-1</sup>  
 230 (**Fig. 6a**). In the first dry year (2014),  $T_s$  decreased by as much as 18 % under a mild water stress ( $D_{mil}$ ) and further by 40 %  
 231 under moderate stress ( $D_{mod}$ ). The  $T_s$  was greatly recovered after a heavy rain (**Fig. 6b**). In the second dry year (2015), the  $T_s$   
 232 decreased by 73 % under  $D_{mod}$  and further by 74 % under  $D_s$  stage (**Fig. 6c**). The daily  $T_s$  under  $D_s$  was only 0.55 mm day<sup>-1</sup>.  
 233 This very little transpiration likely only sufficient to maintain the survival of MP. After a heavy rainfall, even the soil water  
 234 status was improved a lot, the  $T_s$  of trees was still very low (less than 1.4 mm day<sup>-1</sup>), indicating the  $T_s$  of MP was difficult to

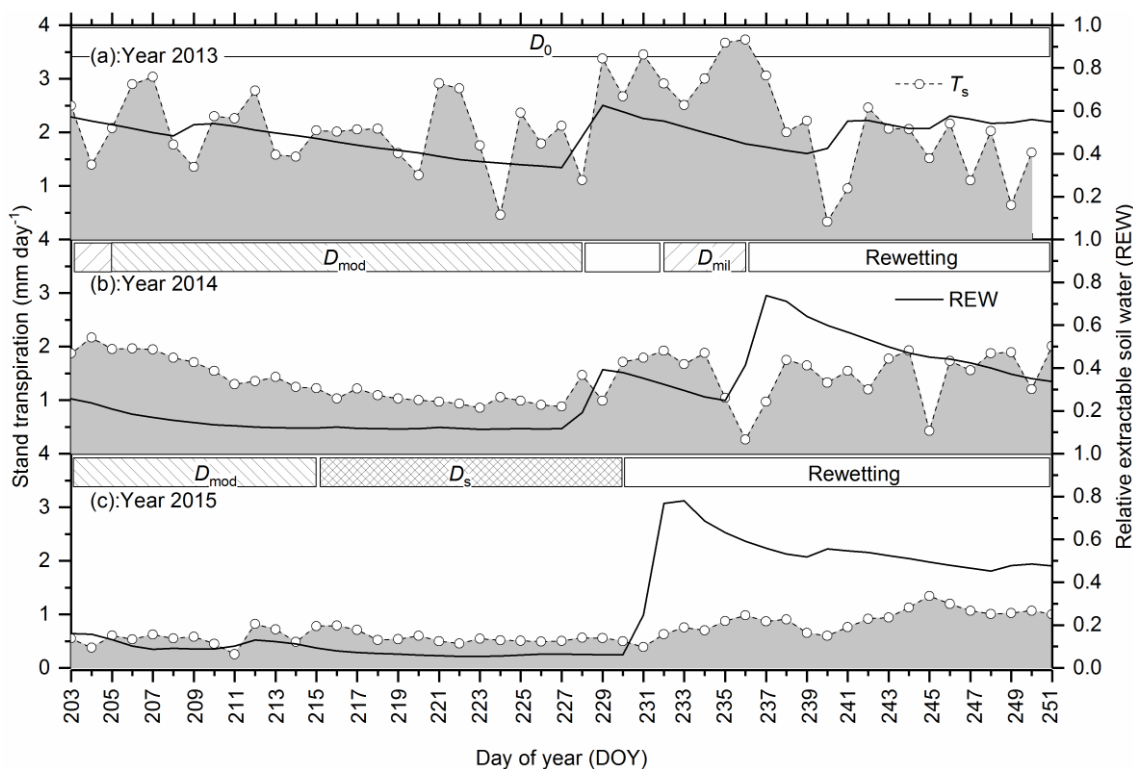

236 **Figure 6** The comparison of measured transpiration ( $T_s$ ) and relative extractable water (REW) in the upper soil layer (above 1 m) during  
 237 maximum growth period from DOY 203 to 251 in 2013 to 2015.  $D_0$ ,  $D_{mil}$ ,  $D_{mod}$ , and  $D_s$  are no, mild, moderate and severe droughts, respec-  
 238 tively (see Table 2). The increase of REW was due to the rainfall.

## 239 4 Discussion

### 240 4.1 Reduction of soil moisture content under droughts

241 In our site, the long term trends for increasing air temperature and decreasing annual precipitation (**Fig. 2**) is unfavorable to  
 242 the growth of trees. The declining groundwater and the coarse sandy soil (>83 % sand particles in our site) prevented capillary  
 243 ascension efficiently (less than 0.5 m) (Vincke and Thiry, 2008). Sandy soils have low water holding capacity and high hy-  
 244 draulic conductivity, thus water percolates through this soil quickly after a rain. During the three-year periods in our site, there  
 245 are an effective rain event every 14 days averagely (rainfall intensity is more than 10 mm per times). Under well-wetted soil  
 246 conditions ( $D_0$ ),  $\bar{\theta}_{0-1.0\text{m}}$  was depleted at the high rate of 1.9 vol % per day during the first two days and at the rate of 0.35 vol %  
 247 per day during the subsequent nine days (**Fig. 7**) because of either soil water holding capacity or great water uptake by trees.

248 The depleting rate of  $\bar{\theta}_{0-1.0\text{ m}}$  under the drought conditions was only 0.09 vol % per day under severe drought. That indicates  
 249 the only little of water was absorbed by trees under severe water stress. Our results suggested the plant might adjust their  
 250 physiological traits, e.g. closing stomatal and reduing root system to at first priority for the survival. The sap flux declines very  
 251 quickly in desiccated root system (Mereu et al., 2009).

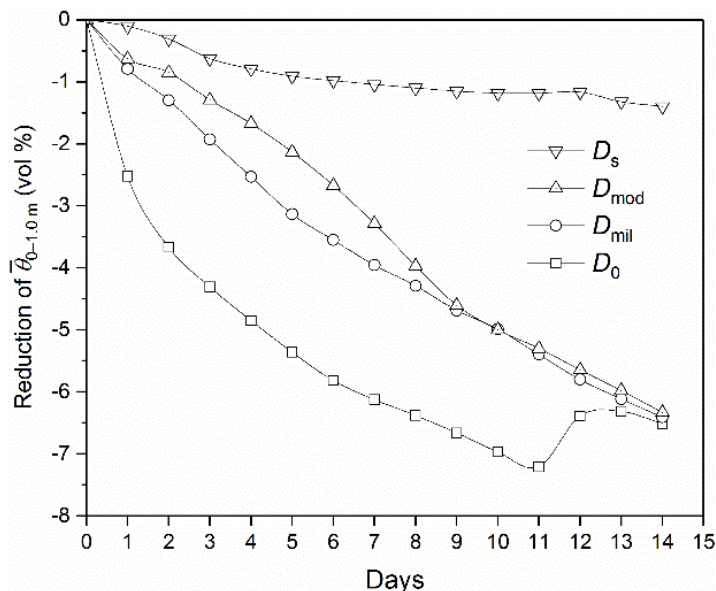

252 **Figure 7** There will be an effective rain event every 14 days averagely in our site (Rainfall intensity is more than 10 mm per times), which  
 253 acted as a window to analyze the decrease rate of soil water during this period. Scatter-line plot described the relationships between decrease  
 254 rate of upper soil moisture ( $\bar{\theta}_{0-1.0\text{ m}}$ ) and time under different initial degree of drought levels which were defined in **Table 2**.

#### 255 4.2 Contribution of water in the upper and deep soil layers

256 The MP is a shallow-rooted species with root density decreasing sharply below 1.0 m (Jiang et al., 2002; Zhu et al., 2005; Zhu  
 257 et al., 2008), implying the soil moisture in the upper 1.0 m layer provides major water source for transpiration (Su et al., 2006;  
 258 Wei et al., 2013; Song et al., 2014). In our study, the rapid recovery of  $T_s$  when  $\bar{\theta}_{0-1.0\text{ m}}$  was increased after a rain (**Figs. 4 and**  
 259 **6**) suggested that MP was very sensitive to the changes in the available water in the upper soil layer. Uptake by the shallow  
 260 roots decreased very significant as this soil layer dried out (**Fig. 6**). However, under severe drought, for example in August of  
 261 2015, the MP trees used quite amount of deep soil water. It might be carried out by developing more letaral root system in  
 262 deep soil. The fine roots of Scots pine die quickly under drought conditions (Vanguelova and Kennedy, 2007). Therefore, it  
 263 would cause a death of new developed fine root system, resulting a permanent declining in the capability of transpiring water



264 even when the soil water status was improved (**Fig. 4**). The death of fine root in deep soil layer may explain why after a rainfall,  
265 post-stress sap flux recovery is very small after a long and severe drought in 2015.

### 266 4.3 Groundwater is an important source for plant adaptation under long and severe drought

267 Mongolian Scots pine is a dimorphic-rooted species where, the maximum taproot depth in a sandy soil can up to 2.7 m (Cana-  
268 dell et al., 1996), and even to 5.2 m for a 42-year-old tree in a sandy soil near our site (Jiang et al., 2002). Our results on the  
269 depletion of soil water in 1.5-2 m soil layers, existed but not large, also suggested a deep taproot depth in MP. This enables  
270 MP trees to use deeper water source (i.e. groundwater), especially under drought (Barbeta et al., 2015; Hentschel et al., 2016).  
271 This is likely to occur when soil moisture content in the upper soil layers (0–60 cm) declines to 3.6 % (Wei et al., 2013; Song  
272 et al., 2016a). In our site,  $g_w$  lowered from  $5.03 \pm 0.14$  m in 2013 to  $5.47 \pm 0.09$  m in 2015 (**Fig. 4e**). From late 2014, the value  
273 of  $g_w$  was always far deeper than 5.2 m and thus unlikely accessible directly by our instrumented trees if their tap roots were  
274 shallower than 5.2 m. However, in the severe drought ( $D_s$ , with minimum  $\bar{\theta}_{0-1.0\text{m}}$  as low as 2.3 %), we recorded a clear diurnal  
275 pattern of sap flux with the much reduced daily  $T_s$  (mean  $0.56 \text{ mm day}^{-1}$ , or 28.2 % of that for  $D_0$ ). Hence, we inferred that  
276 significant groundwater contributions to  $T_s$  occurred only under severe drought conditions though determining just what pro-  
277 portion of that water came from the groundwater or from tree storage is beyond the scope of this study. It has been reported  
278 that as rainfall decreases, tree dependence on groundwater increases (Kume et al., 2007).

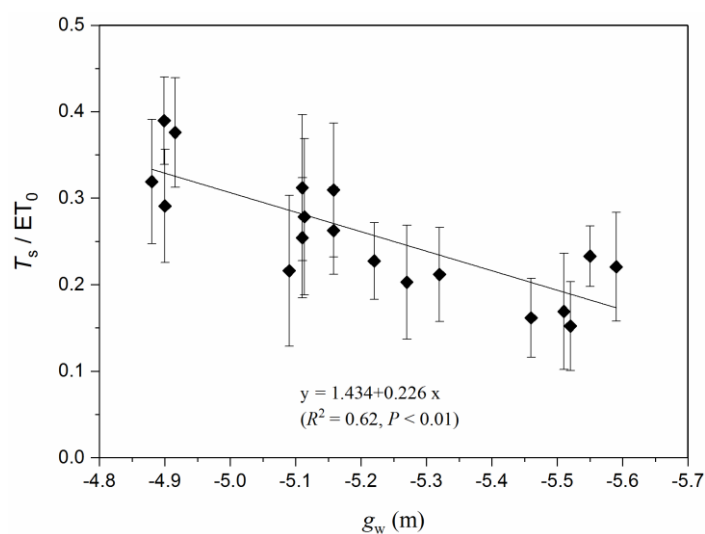

279 **Figure 8** Normalized transpiration ( $T_s / ET_0$ ) in Mongolian Scots pine affected by the groundwater table ( $g_w$ ).

#### 280 4.4 Transpiration of the plantation and implications

281 There is a complex interplay between the various meteorological factors, e.g. solar radiation, vapour pressure deficit, air tem-  
282 perature, wind speed and relative humidity, and directly or indirectly influences transpiration in a tree. These variables were  
283 aggregated into a variable  $ET_0$ , which serves as an index of atmospheric water demand power (Zha et al., 2010). Therefore, as  
284 expected, changes in  $ET_0$  trigger a prompt plant response in terms of transpiration. Changes in precipitation (and hence soil  
285 moisture) affect transpiration but likely over a long temporal scale (Yan et al., 2016). Our results also showed a strong reduction  
286 in normalized transpiration  $T_s/ET_0$  mostly after a long period drought. Using normalized transpiration allows to focus on the  
287 effects of soil water availability and plant physiological responses. This behavior has also been found in Scots pine in Europe  
288 (Poyatos et al., 2005), presenting the strong effects of stomatal regulation for controlling the rate of water loss. The significant  
289 fall in  $g_w$  seems to explain the difficulty in plant recovery of  $T_s$  after a heavy rain.

290 The reduction in transpiration of MP due to soil water shortage was 25% in first dry year and 58% in the second dry year  
291 (**Table 3**). This is comparable with reported values of 40 to 80 % for different species in different habitats (Leuzinger et al.,  
292 2005; Gartner et al., 2009; Betsch et al., 2011). Average cumulative  $T_s$  values in testing MP during a whole growing season  
293 ranged from 145 to 357 mm. This was higher than in a sparse forest of 150-year-old Scots pine growing in an inner Alpine dry  
294 valley (Wieser et al., 2014) and in northeastern Germany (Lüttschwager et al., 1998) due to the larger canopy size and envi-  
295 ronmental conditions. In this study, the annual water transpiration by MP in wet year (357 mm) is nearly equal to 75 % of the  
296 total annual precipitation in a historical normal year. However, considering the soil evaporation, transpiration by understory  
297 plants (e.g. weeds), and leaf interception and vaporization, the current stand density of 625 trees per ha is likely too high for a  
298 sustainable ecosystem of Mongolian Scots pine forestry.

299 Transpiration in a coniferous forest is often conservative with relatively low values of canopy conductance (Levitt, 1980). For  
300 instance, Scots pine has a rather conservative water use strategy with a very plastic response to intermittent dry periods with  
301 high use of stored water (Arneth et al., 2006; Verbeeck et al., 2007). In our study, we found MP was more moderate in its  
302 water consumption than many broad-leaved forest tree species growing nearby (e.g. *Populus* spp) (Zhu et al., 2005). Although

303 the groundwater table decreases in our experiment, the MP still contributes less to the groundwater table decline than the more  
304 extensive and/or intensive agricultural land uses (0.1 m per year) (Song et al., 2016b). The lateral roots of an MP tree can  
305 extend laterally to about 0.65-times tree height (Jiang et al., 2002; Su et al., 2006). This helps MP to obtain water from the  
306 upper soil layers efficiently (Song et al., 2014). The ability of MP to maintain a low sap flux even during severe drought  
307 suggests a strong adaptation under climate change (Waromg et al., 1979), especially when the extreme weather events increase  
308 in the future. However, the advanced mature period was found when Mongolian Scots pine introduced from the north (origin  
309 distribution region) to south (planted region, this study area) (Jiao et al. 1989; 2001). The difficulty in recovery for water  
310 uptake by 30 years MP trees under severe drought might also caused by the low growth vigor of old trees. It implies that the  
311 re-forestry might be necessary when MP trees are over 30 years old.

## 312 **5 Conclusions**

313 Mongolian Scots pine was relatively conservative in water use with a maximum of 3.73 mm day<sup>-1</sup>. Stand transpiration during  
314 the growing season ranged from 149 mm in an extreme dry year to 357 mm in a wet year. The sap flux in MP responded  
315 strongly to soil water availability. The daily sap flux reduced with drought by 74% as the duration and intensity of drought  
316 was high in dry years. The ability of recovery in plant transpiration was limited by the duration and severity of drought. Our  
317 results suggest that the degradation in MP plantation is attributable to the combined effects of large temporal variation in  
318 rainfall and the ability of specific recovery after the occurrence of drought. The results could help farmer improve the man-  
319 agement and sustainability of MP forestry by optimizing plant density and reforestation in semi-arid region.

## 320 **Acknowledgements**

321 This work was supported by the Fundamental Research Funds for the Central Non-profit Research Institution of CAF  
322 (No.CAFYBB2014MA013), the Major State Basic Research Development Program of China (973 Program) (No.  
323 2013CB429901) and the National Natural Science Foundation of China (No.31570704). We thank Dr. Alexander Lang  
324 for his useful discussions and suggestions. Field support for this research was provided by Zhanggutai National Studies  
325 Station for Desert Ecosystem of China (CDERN).

326 **References**

- 327 Allen, R.G., Pereira, L.S., Raes, D. and Smith, M.: Crop evapotranspiration: Guidelines for computing crop water requirements,  
328 FAO irrigation and drainage paper 56, FAO, Rome, Italy, 1998.
- 329 Arneth, A., Veenendaal, E.M., Best, C., Timmermans, W., Kolle, O., Montagnani, L. and Shibistova, O.: Water use strategies  
330 and ecosystem-atmosphere exchange of CO<sub>2</sub> in two highly seasonal environments, *Biogeosciences*, 3, 421–437, 2006.
- 331 Barbeta, A., Mejía-Chang, M., Ogaya, R., Voltas, J., Dawson, T.E. and Peñuelas, J.: The combined effects of a long-term  
332 experimental drought and an extreme drought on the use of plant-water sources in a Mediterranean forest, *Global Change  
333 Biol.*, 21, 1213–1225, 2015.
- 334 Betsch, P., Bonal, D., Breda, N., Montpied, P., Peiffer, M., Tuzet, A. and Granier, A.: Drought effects on water relations in  
335 beech: The contribution of exchangeable water reservoirs, *Agr. Forest Meteorol.*, 151, 531–543, 2011.
- 336 Bovard, B.D., Curtis, P.S., Vogel, C.S., Su, H.B. and Schmid, H.P.: Environmental controls on sap flow in a northern hardwood  
337 forest, *Tree Physiol.*, 25, 31–38, 2005.
- 338 Campbell, G.S. and Norman, J.M.: An introduction to environmental biophysics, Springer, New York, 286 pp, 1998.
- 339 Canadell, J., Jackson, R.B., Ehleringer, J.B., Mooney, H.A., Sala, O.E. and Schulze, E.D.: Maximum rooting depth of vegeta-  
340 tion types at the global scale, *Oecologia*, 108, 583–595, 1996.
- 341 Chirino, E., Bellot, J. and Sanchez, J.R.: Daily sap flow rate as an indicator of drought avoidance mechanisms in five Medi-  
342 terranean perennial species in semi-arid southeastern Spain, *Trees*, 25, 593–606, 2011.
- 343 Dang, H.Z., Zha, T.S., Zhang, J.S., Li, W. and Liu, S.Z.: Radial profile of sap flow velocity in mature Xinjiang poplar (*Populus*  
344 *alba* L. var. *pyramidalis*) in Northwest China, *J. Arid Land*, 6, 612–627, 2014.
- 345 D'Odorico, P. and Porporato, A.: Soil moisture dynamics in water-limited ecosystems, *Ecohydrology*, Dryland, Springer, Neth-  
346 erlands, 31–46, 2006.
- 347 Gartner, K., Nadezhkina, N., Englisch, M., Cermak, J. and Leitgeb, E.: Sap flow of birch and Norway spruce during the  
348 European heat and drought in summer 2003, *Forest Ecol. Manag.*, 258, 590–599, 2009.
- 349 Granier, A.: A new method of sap flow measurement in tree stems, *Annales Des Sciences Forestieres*, 42, 193–200, 1985.

350 Granier, A.: Evaluation of transpiration in a Douglas-fir stand by means of sap flow measurements, *Tree Physiol.*, 3, 309–320,  
351 1987.

352 Hentschel, R., Hommel, R., Poschenrieder, W., Grote, R., Holst, J., Biernath, C., Gessler, A. and Priesack, E.: Stomatal con-  
353 ductance and intrinsic water use efficiency in the drought year 2003: a case study of European beech, *Trees*, 30, 153–174,  
354 2016.

355 IPCC: Climate change 2007: the scientific basis, <http://www.ipcc.ch/>, last access: 28 February 2017.

356 Jiang, F.Q., Cao, C.Y., Zeng, D.H., Guan, W.B., Wu, X.Y. and Zheng, Y.R.: Degradation and restoration of ecosystems on  
357 Keerqin Sandy Land, Chinese Forestry Press, Beijing, 282 pp, 2002 (in Chinese).

358 Jiao, S.R.: Structure and function of forestry ecosystem for sand-fixation in Zhanggutai area, Liaoning Science and Technology  
359 Press, Shenyang, 114 pp, 1989 (in Chinese).

360 Jiao, S.R.: Report on the causes of the early decline of *Pinus slyvestris* var. *mongolica* shelterbelt and its preventative and  
361 control measures in Zhanggutai of Liaoning Province, *Scientia Silvae Sinicae*, 37, 131–138, 2001 (in Chinese with Eng-  
362 lish abstract).

363 Kume, T., Takizawa, H., Yoshifuji, N., Tanaka, K., Tantasirin, C., Tanaka, N. and Suzuki, M.: Impact of soil drought on sap  
364 flow and water status of evergreen trees in a tropical monsoon forest in northern Thailand, *Forest Ecol. Manag.*, 238,  
365 220–230, 2007.

366 Leo, M., Oberhuber, W., Schuster, R., Grams, T.E.E., Matyssek, R. and Wieser, G.: Evaluating the effect of plant water avail-  
367 ability on inner alpine coniferous trees based on sap flow measurements, *Eur. J. Forest Res.*, 133, 691–698, 2013.

368 Leuzinger, S., Zotz, G., Asshoff, R. and Korner, C.: Responses of deciduous forest trees to severe drought in Central Europe.,  
369 *Tree Physiol.*, 25, 641–650, 2005.

370 Levitt, J.: Responses of plants to environmental stresses, Academic Press, New York, USA, 256 pp, 1980.

371 Lu, P., Urban, L. and Zhao, P.: Granier's thermal dissipation probe (TDP) method for measuring sap flow in trees: theory and  
372 practice, *Acta Botanica Sinica*, 46, 631–646, 2004.

- 373 Lüttschwager, D., Wulf, M., Rust, S., Forkert, J., Hüttl, R.F., Hüttl, R.F. and Bellmann, K.: Tree canopy and field layer tran-  
374 spiration in Scots pine stands, *Changes of Atmospheric Chemistry and Effects on Forest Ecosystems*, Springer, Nether-  
375 lands, 97–110, 1998.
- 376 Meinzer, F.C., Brooks, J.R., Domec, J.C., Gartner, B.L., Warren, J.M., Woodruff, D.R., Bible, K. and Shaw, D.C.: Dynamics  
377 of water transport and storage in conifers studied with deuterium and heat tracing techniques, *Plant, Cell and Environment*,  
378 29, 105–114, 2006.
- 379 Mereu, S., Salvatori, E., Fusaro, L., Gerosa, G., Muys, B. and Manes, F.: An integrated approach shows different use of water  
380 resources from Mediterranean maquis species in a coastal dune ecosystem, *Biogeosciences*, 6, 2599–2610, 2009.
- 381 Nadezhdina, N., Cermak, J. and Ceulemans, R.: Radial patterns of sap flow in woody stems of dominant and understory species:  
382 scaling errors associated with positioning of sensors, *Tree Physiol.*, 22, 907–918, 2002.
- 383 Poyatos, R., Llorens, P. and Gallart, F.: Transpiration of montane *Pinus sylvestris* L. and *Quercus pubescens* Willd. forest  
384 stands measured with sap flow sensors in NE Spain., *Hydrol. Earth Syst. Sc.*, 9, 493–505, 2005.
- 385 Song, L.N., Zhu, J.J., Li, M.C. and Yu, Z.Y.: Water utilization of *Pinus sylvestris* var. *mongolica* in a sparse wood grassland  
386 in the semiarid sandy region of Northeast China, *Trees*, 28, 971–982, 2014.
- 387 Song, L.N., Zhu, J.J., Li, M.C., Zhang, J.X. and Lv, L.Y.: Sources of water used by *Pinus sylvestris* var. *mongolica* trees based  
388 on stable isotope measurements in a semiarid sandy region of Northeast China, *Agr. Water Manage.*, 164, 281–290, 2016a.
- 389 Song, L.N., Zhu, J.J., Li, M.C. and Zhang, J.X.: Water use patterns of *Pinus sylvestris* var. *mongolica* trees of different ages  
390 in a semiarid sandy lands of Northeast China, *Environ. Exp. Bot.*, 129, 94–107, 2016b.
- 391 Su, F.L., Liu, M.G., Guo, C.J. and Zhang, Q.: Characteristics of vertical distribution of root system of Mongolian scots pine  
392 growing in sandy area and influence to the soil, *Soil and Water Conservation in China*, 286, 20–23, 2006 (in Chinese with  
393 English abstract).
- 394 Su, H., Li, Y.G., Liu, W., Xu, H. and Sun, O.J.: Changes in water use with growth in *Ulmus pumila* in semiarid sandy land of  
395 northern China, *Trees*, 28, 41–52, 2014.
- 396 Tang, F.D., Lin, Y. and Li, Y.: Impact of water stress photosynthesis characteristics of Mongolian pine seedlings and Grafting

397 Korean pine seedlings with stocks of Mongolian pine, *Journal of Liaoning University*, 42, 274-276, 2015 (in Chinese  
398 with English abstract).

399 Vanguelova, E.I. and Kennedy, F.: Morphology, biomass and nutrient status of fine roots of Scots pine (*Pinus sylvestris*) as  
400 influenced by seasonal fluctuations in soil moisture and soil solution chemistry, *Plant Soil*, 270, 233–247, 2007.

401 Verbeeck, H., Steppe, K., Nadezhdina, N., De Beeck, M.O., Deckmyn, G., Meiresonne, L., Lemeur, R., Cermak, J., Ceulemans,  
402 R. and Janssens, I.A.: Model analysis of the effects of atmospheric drivers on storage water use in Scots pine, *Biogeosci-*  
403 *ences*, 4, 657–671, 2007.

404 Vincke, C. and Thiry, Y.: Water table is a relevant source for water uptake by a Scots pine (*Pinus sylvestris* L.) stand: Evidences  
405 from continuous evapotranspiration and water table monitoring, *Agr. Forest Meteorol.*, 148, 1419–1432, 2008.

406 Warong, R.H., Whitehead, D. and Jarvis, P.G.: The contribution of stored water to transpiration in Scots pine, *Plant, Cell &*  
407 *Environment*, 2, 309–317, 1979.

408 Wei, Y.F., Fang, J., Liu, S., Zhao, X.Y. and Li, S.G.: Stable isotopic observation of water use sources of *Pinus sylvestris* var.  
409 *mongolica* in Horqin Sandy Land, China, *Trees*, 27, 1249–1260, 2013.

410 Wesche, K., Walther, D., Wehrden, H.V. and Hensen, I.: Trees in the desert: Reproduction and genetic structure of fragmented  
411 *Ulmus pumila* forests in Mongolian drylands, *Flora*, 206, 91–99, 2011.

412 Wieser, G., Leo, M. and Oberhuber, W.: Transpiration and canopy conductance in an inner alpine Scots pine (*Pinus sylvestris*  
413 L.) forest, *Flora - Morphology, Distribution, Functional Ecology of Plants*, 209, 491–498, 2014.

414 Yan, M.J., Zhang, J.G., He, Q.Y., Shi, W.Y., Otsuki, K., Yamanaka, N. and Du, S.: Sapflow-based stand transpiration in a  
415 semiarid natural oak forest on China's Loess Plateau, *Forests*, 7, 227–240, 2016.

416 Yuan, M.W., Zhang, L.Z., Gou, F., Su, Z., Spiertz, J.H.J., van der Werf, W.: Assessment of crop water productivity in semi-  
417 arid Inner Mongolia. *Agr. Water Manage.*, 122, 28–38, 2013.

418 Zha, T.S., Barr, A.G., Kamp, G.V.D., Black, T.A., McCaughey, J.H. and Flanagan, L.B.: Interannual variation of evapotran-  
419 spiration from forest and grassland ecosystems in western Canada in relation to drought, *Agr. Forest Meteorol.*, 150,  
420 1476–1484, 2010.

- 421 Zheng, X., Zhu, J.J., Yan, Q.L. and Song, L.N.: Effects of land use changes on the groundwater table and the decline of *Pinus*  
422 *sylvestris* var. *mongolica* plantations in southern Horqin Sandy Land, Northeast China, *Agr. Water Manage.*, 109, 94–  
423 106, 2012.
- 424 Zhu, J. J., Li, F.Q., Xu, M.L., Kang, H.Z. and Wu, X.Y.: The role of ectomycorrhizal fungi in alleviating pine decline in  
425 semiarid sandy soil of northern China: an experimental approach, *Ann. Forest Sci.*, 65, 304, 2008.
- 426 Zhu, J.J., Kang, H.Z., Li, Z.H., Wang, G.C. and Zhang, R.S.: Impact of water stress on survival and photosynthesis of Mongolian  
427 pine seedlings on sandy land, *Acta Ecologica Sinica*, 25, 2527-2533, 2005 (in Chinese with English abstract).
- 428 Zhu, J.J., Zeng, D.H., Kang, H.Z., Wu, X.Y. and Fan, Z.P.: Decline of *Pinus sylvestris* var. *mongolica* plantations on Sandy  
429 Land, Chinese Forestry Press, Beijing, 264 pp, 2005 (in Chinese with English abstract).
