# Supplementary material for: Rainfall pattern greatly affects water use by Mongolian Scots pine on a sandy soil, in a semi-arid climate
Source: Copernicus journal article supplement (doi:10.5194/bg-2017-69), 2017-03-13
Supplement: Supplementary file [file bg-2017-69-AC4-supplement.pdf]

1 **Severe drought greatly reduces sap flux of Mongolian Scots pine (*Pinus***  
2 ***sylvestris* var. *mongolica*) and its recovery ability in a sandy and**  
3 **semi-arid environment**

4 HongZhong DANG<sup>1,a</sup>, LiZhen ZHANG<sup>2</sup>, WenBin YANG<sup>1</sup>, JinChao FENG<sup>1</sup>, Hui HAN<sup>3</sup>, Wei LI<sup>1</sup>

5 <sup>1</sup> Institute of Desertification Studies, Chinese Academy of Forestry, Beijing, 100091, China

6 <sup>2</sup> Institute of Resources and Environment, China Agricultural University, Beijing, 100094, China

7 <sup>3</sup> Institute of Sand Fixation and Afforestation of Liaoning Province, Fuxin, 123000, China

8 <sup>a</sup> Correspondence to: HongZhong DANG ([hzdang@caf.ac.cn](mailto:hzdang@caf.ac.cn))

9

10 **Abstract.** Trees growing in water limited ecosystems are often exposed to the significant challenges of soil water stress due  
11 to low precipitation and high variation. In this study, we aimed to quantify the sap flux of Mongolian Scots pine (*Pinus*  
12 *sylvestris* var. *mongolica*) growing on a sandy soil, in a region characterised by an erratic rainfall pattern. Measurements were  
13 made over three successive years of contrasting annual rainfall - a wet year (2013), a dry year (2014), and a second dry year  
14 (2015). Over the three years, sap flux density ( $J_s$ ) was measured at outer 3 cm width conductive xylem of 25 tree samples,  
15 then were up-scaled to daily transpiration at tree- and plot-level ( $T_s$ ). Due to the high variation of rainfall in three years, the  
16 measurements reflected the tree response to wide range of water stress from wet (2013), mild-drought (2014) to severe-drought  
17 (2015). Generally, the normalized  $T_s$  during growing seasons decreased by 25% in dry year 2014 and 58% in second dry year  
18 2015. Stand transpiration fluctuated widely over quite short time scales (months or weeks) due to the erratic rainfall and sandy  
19 soil coupling with a declining groundwater table. Particularly, under a long-period of drought stress in late season in 2014 and  
20 early season in 2015, transpiration of Mongolian Scots pine have been restricted greatly, and the recovery of  $T_s$  following  
21 heavy rainfall was incomplete (63–69%). Our results help elucidate the interplay between the effects of the atmosphere and  
22 soil moisture on tree sap flux, and highlight the negative effects of drought on sap flux of mature forest tree. Our findings  
23 provide the evidence for the observed premature degradation of these Mongolian Scots pine plantations in terms of an eco-

24 hydrological perspective.

25 **Keywords:** sap flux; Mongolian Scots pine (*Pinus sylvestris* var. *mongolica* Litv); soil water availability; water stress; sandy

26 soils; semi-arid climate.

27

28 **1 Introduction**

29 Reforestation has been used widely in semi-arid areas to control soil erosion, to capture carbon and to serve as wind breaks  
30 (D'Odorico and Porporato, 2006). However, trees growing in severely water-limited ecosystems are often exposed to signifi-  
31 cant challenge due to insufficient soil water (Wesche et al., 2011; Su et al., 2014). Many factors influence the amount of soil  
32 water and its availability to vegetation, for instance, the amounts and timings of rainfall interval, soil water capacity, root  
33 water-uptake capacity and the availability of alternative water sources such as groundwater (Meinzer et al., 2006). Under  
34 climate change, the increasing in the frequency and severity of drought decreases soil water availability in the future (Leo et  
35 al., 2013). This would increase tree mortality rate through excessive competition for water and thus influences the structure  
36 and function of forest ecosystems (Barbeta et al., 2015). Quantification of sap flux by trees at individual and forest levels could  
37 help us to understand how environmental factors affect their water usage. It is necessary to properly assess the impacts of  
38 climate change on ecological and hydrological processes in the fragile ecosystems (Bovard et al., 2005). This knowledge would  
39 allow us to make better forest establishment decisions and management actions.

40 Mongolian Scots pine (*Pinus sylvestris* var. *mongolica*, MP), a geographical variety of Scots pine (*P. sylvestris*), is natu-  
41 rally widely distributed in northern China and in parts of Russia and Mongolia. It is found in the Daxinganling Mountains  
42 (50°10'–53°33' N, 121°11'–127°10' E) and in Honghuaerji on the Hulun Buir sandy plains of the northeast (Zhu et al., 2008;  
43 Zheng et al., 2012). The MP is a popular species for reforestation in northern China due to its traits of good drought and cold  
44 resistance. Consequently, more than  $6.7 \times 10^5$  ha of MP plantations have been established to control desertification, in the great  
45 project of the Three-North Shelter Forest Program (TNSFP) launched in China from 1978 (Zheng et al., 2012). Unfortunately,  
46 serious degradation and considerable concern has occurred in these plantations since the mid-1990s, such as poor tree health  
47 and numerous tree death, particularly on the sandy soils in southern Horqin (42°43' N, 122°22' E, our study area) (Jiao, 2001;  
48 Zhu et al., 2008) (**Fig. 1**).

49

50

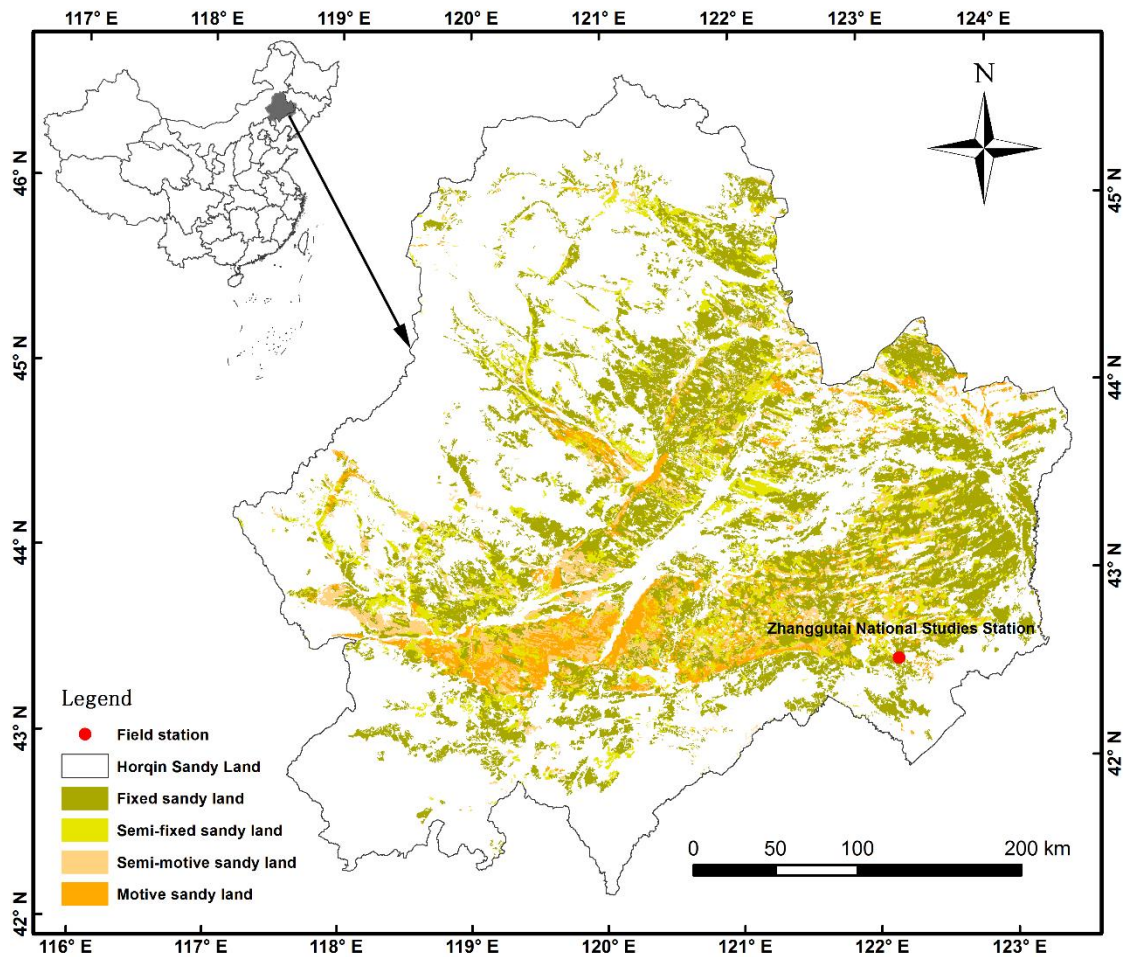

51 **Figure 1** Location and environment of Horqin region in Liaoning province, China (study area)

52 A key driver for the degradation in water-limited ecosystems is regional low and erratic precipitation, which reduces soil  
 53 water availability (Mereu et al., 2009). In semi-arid southern Horqin, three main soil-water related factors causes the degrada-  
 54 tion, i.e. the high inter-annual variation in precipitation, the high intra-seasonal variability in precipitation and the declining  
 55 groundwater table (Jiao, 1989; Song et al., 2014). The forest's sensitivity to drought is highly species-specific, climate-specific  
 56 and site-specific. It was reported that more than 85 % of roots system of Mongolian Scots pine grows in the upper 0.4 m soil  
 57 layer in this region, and the root density is sharply decreased below 1.0 m soil depth (Su et al., 2006). However, it remains  
 58 unclear how, and to what extent, these three factors are responsible for the degradation of this shallow-rooted species recorded  
 59 in this region.

60 In this study, we hypothesize that on the long-period drought in semi-arid sandy environment raising from the high vari-  
 61 ation of precipitation and low water holding capacity is the major reason causing the degradation of forest. The aims of this  
 62 study were: (1) to compare the change of daily sap flux of MP based on sap flux density measurements in relation to the three  
 63 contrasting precipitation years; (2) to determine the relationship between soil water availability, groundwater table and the  
 64 responsibility of transpiration on driving from atmosphere; (3) to explore the effect of the severity of the drought stress over  
 65 number of cycles of soil wetting and drying on daily sap flux and recovery ability.

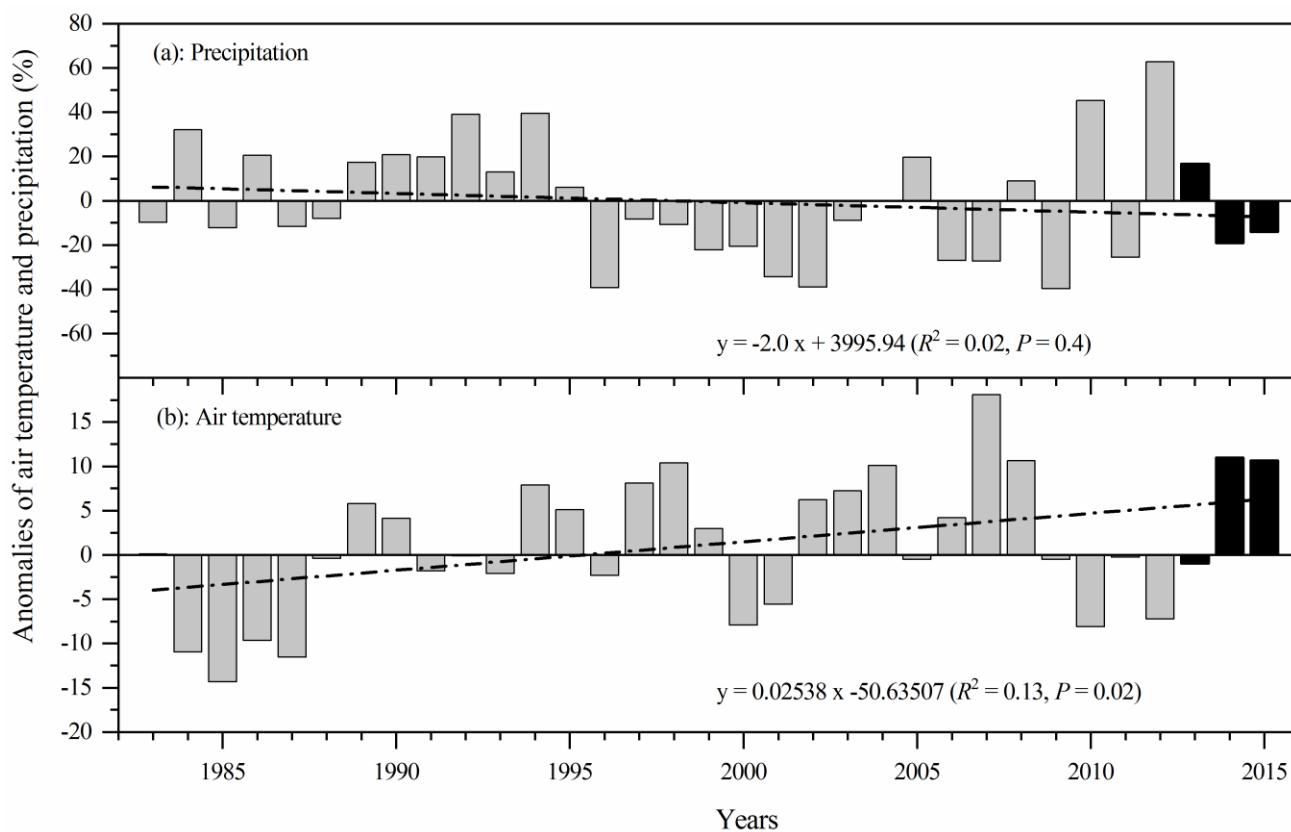

66 **Figure 2** Annual variations of precipitation (a), mean air temperature (b) at Zhanggutai. Grey color indicates the data before the experiment  
 67 (1983-2012) and black for the years of experiments (2013-2015). The dashed lines indicate the linear regressions over the whole period.

68

## 69 2 Materials and methods

### 70 2.1 Site description

71 The trial was carried out at the Zhanggutai National Desertification Control Trial Station located at the southern edge of the  
 72 Horqin region in Liaoning province, China (122° 22' E, 42° 43' N, at 226.5 m a.s.l.) (**Fig. 1**). The experiment was conducted in

73 a 40 ha plantation with 35-year old MP. Tree density was 625 trees per ha. Management interventions and other human dis-  
74 turbances were limited by the installation of a secure fence around the experiment field. The site has a semi-arid, continental  
75 climate with a mean annual temperature of 7.9 °C, a frost-free period of 150–160 days per year, a mean annual evaporation of  
76 1553 mm and a long-term annual mean precipitation of 475 mm ( $P_{ave}$ ) over the last 30 years (1983–2012) with coefficient of  
77 variance of 0.27 (Zhu et al., 2005). Over the long period, there have been a number of consecutive dry years. For instance,  
78 annual precipitation between 1996 and 2004 were below  $P_{ave}$  (**Fig. 2a**). Usually, about 60 to 70 % of annual rainfall occurs in  
79 the three months from June to August. The value of annual temperature over the last 30 years was increased slightly at a rate  
80 of 0.03 °C yr<sup>-1</sup> (**Fig. 2b**), while annual precipitation was slightly decreased with a rate of 2.0 mm yr<sup>-1</sup> (**Fig. 2a**). The soil is  
81 sandy with a sedimentary aeolian sand layer more than 3 m and an ancient alluvial sand layer with the total depth more than  
82 126 m (Jiao, 1989). The mean bulk density of the upper 2 m soil layer is 1.61 g cm<sup>-3</sup>. The mean soil texture is 83 % of sand (>  
83 0.05 mm), 9 % of silt (0.05–0.002 mm) and 8 % of clay (< 0.002 mm). The organic matter content is 0.3–1.0 g kg<sup>-1</sup>. The  
84 understory plant species in the forestry are *Acer pictum* subsp. *mono* Maxim, *Crataegus pinnatifida* var. *major* N. E. Brown.,  
85 *Lespedeza bicolor* Turcz., *Artemisia halodendron* Turcz et Bess., *Cleistogenes chinensis* Maxim.

## 86 **2.2 Experimental design and samplings**

87 To break the prevailing northerly winds, the MP were planted in a square-grid pattern with 4 m for both row spacing and plant  
88 distance. Total area of experiment was 400 m<sup>2</sup> (20×20 m) containing 25 trees. All trees in the area were planted at same year  
89 in sole system surrounded by a wire fence (**Fig. 3**). The growth of trees in the experiment was normal in 2013, however, the  
90 leaves of trees in 2015 turned to grey slightly. The obvious defoliation or death did not occurred in 2015. Sap flow sensors  
91 were installed in each tree (totally 25 trees) in experimental area in 2013. Due to the damage of sensors, 22 left in 2014 and 13  
92 left in 2015. The characteristics of the sampled trees are shown in **Table 1**. Diameters at breast height (DBH) were measured  
93 with a diameter tape and tree height with an altimeter. The thickness of bark, sapwood and heartwood were measured by  
94 sampling core at the height of sensors installed with a Pressler increment borer. Thickness measurements were made with a  
95 Vernier caliper with tissue boundaries identified based on color. In our Mongolian Scots pine, the sapwood color was yellow-

96 white and that of the heartwood was tan. A few drops of methyl orange solution helped define the interface where the boundary  
 97 was indistinct. The DBH, tree height and sapwood areas of the sampled trees in 2013, 2014 and 2015 were not significantly  
 98 different ( $P > 0.05$ ), indicating a good uniformity of testing trees.

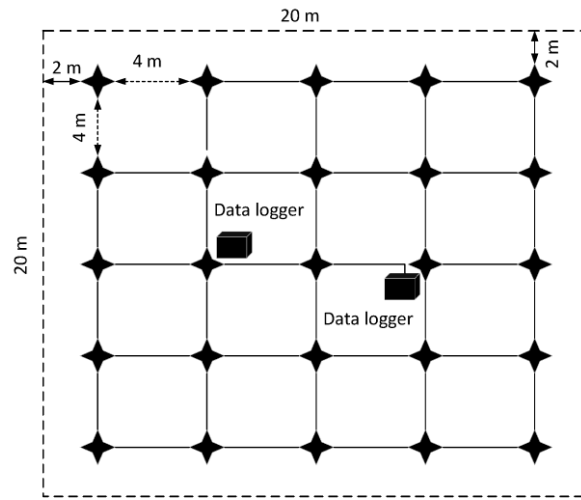

105 **Figure 3** Sketch map of 25 sample trees (stars) planted in a 4x4 m spaced square grid of about 400 m<sup>2</sup> (dashed line is border fence). Tree  
 106 ages were identical and tree sizes were similar. The number of instrumented trees decreased in 2014, and again in 2015 due to sensors  
 107 damage during the reinstallation. Details of samples see **Table 1**.

109 **Table 1** Diameter at breast height (DBH, cm), tree height ( $H$ , m), height of first live branch ( $H_b$ , m), 1<sup>st</sup> quartile of DBH ( $Q_1$ ),  
 110 3<sup>rd</sup> quartile of DBH ( $Q_3$ ), sapwood width (SW, cm), sapwood area ( $A_s$ , cm<sup>2</sup>) in 2013 to 2015. The mean values and standard  
 111 deviations (S.D.) were given, the  $n$  is the number of sampling trees.

| Year              | DBH (cm)        |       |       | $H$ (cm)       | $H_b$ (cm)    | SW (cm)       | $A_s$ (cm <sup>2</sup> ) |
|-------------------|-----------------|-------|-------|----------------|---------------|---------------|--------------------------|
|                   | mean $\pm$ S.D. | $Q_1$ | $Q_3$ |                |               |               |                          |
| 2013 ( $n = 25$ ) | 18.0 $\pm$ 2.7  | 16.1  | 18.9  | 10.3 $\pm$ 0.7 | 4.5 $\pm$ 1.1 | 5.5 $\pm$ 0.6 | 203 $\pm$ 58.6           |
| 2014 ( $n = 22$ ) | 17.1 $\pm$ 2.1  | 15.6  | 18.7  | 9.3 $\pm$ 0.8  | 3.7 $\pm$ 0.5 | 5.3 $\pm$ 0.5 | 182 $\pm$ 42.0           |
| 2015 ( $n = 13$ ) | 17.7 $\pm$ 2.2  | 17.2  | 18.8  | 9.1 $\pm$ 0.8  | 3.7 $\pm$ 0.3 | 5.4 $\pm$ 0.5 | 189 $\pm$ 52.3           |

## 113 2.3 Measurements

### 114 2.3.1 Micrometeorological variables

115 Micrometeorological variables including solar radiation ( $R_s$ ), net radiation ( $R_n$ ), air temperature ( $T_a$ ), relative humidity (RH),  
116 wind speed ( $W_s$ ) and rainfall ( $R$ ) were measured using an automatic weather station (AR5, Avalon Scientific, Inc. USA) lo-  
117 cated about 50 m away from the experimental field. All sensors were installed 2.0 m above the ground except the rain gauge,  
118 which was 0.5 m above the ground. Variables were measured at 1 min intervals, averaged and recorded per hour. Reference  
119 evapotranspiration ( $ET_0$ ) was calculated using the FAO Penman-Monteith equation based on the variables  $R_n$ ,  $T_a$ , RH and  $W_s$   
120 (Allen et al., 1998) at hourly base (Eq. (1)). Daily  $ET_0$  was summed from hourly  $ET_0$  for a day.

$$121 \quad ET_0 = \frac{0.408(R_n - G) + \gamma \frac{900}{T_a + 273} u_2 (e_s - e_a)}{\Delta + \gamma(1 + 0.34u_2)} \quad (1)$$

122 where  $ET_0$  = reference evapotranspiration ( $\text{mm h}^{-1}$ ),

123  $\Delta$  = slope of saturated water vapour pressure against air temperature  $T_a$  ( $\text{kPa } ^\circ\text{C}^{-1}$ ),

124  $R_n$  = net radiation ( $\text{MJ m}^{-2}$ ),

125  $G$  = soil heat flux ( $\text{MJ m}^{-2}$ ),

126  $\gamma$  = the psychrometric constant ( $\text{kPa } ^\circ\text{C}^{-1}$ ),

127  $e_s$  = saturated vapour pressure (kPa),

128  $e_a$  = actual vapour pressure (kPa), and

129  $u_2$  = mean wind speed at 2 m height ( $\text{m s}^{-1}$ ).

130 The value of vapor pressure deficit ( $D$ , kPa) was calculated using the following formula (Campbell and Norman, 1998):

$$131 \quad D = 0.611 \exp\left(\frac{17.502T_a}{T_a + 240.97}\right) (1 - \text{RH}) \quad (2)$$

### 132 2.3.2 Soil moisture content and groundwater table

133 Volumetric soil moisture contents ( $\theta$ , %) were measured at depths of 0.1, 0.2, 0.4, 0.6, 0.9, 1.2, 1.6 and 2.0 m using ECH<sub>2</sub>O

134 EC-5 sensors (Decagon Devices Inc., USA). Three placements in experiment area were measured. Each placement was set



135 between four neighborhood sample trees. Measurements were done at 10 min intervals with hourly means recorded by a  
 136 SQ2020 data logger (Grant Instruments Ltd, UK). The sensors was calibrated using a site-specific equation based on the  
 137 oven-drying method (Eq. (3)):

$$138 \quad \theta = 0.9677\theta_s + 0.2635 \quad (R^2 = 0.96, n = 194, \text{RMSE} = 0.41) \quad (3)$$

139 where  $\theta_s$  are the output of the sensors;  $\theta$  is the calibrated soil moisture content at each depth and placement. The mean  $\theta$   
 140 within a certain soil layer was weight-averaged based on the depth of sensor installation. The mean field capacity ( $\theta_{fc}$ ) in 0-1  
 141 m soil layer of testing soil is 18.0 % by field observation. The minimum soil moisture content ( $\theta_{min}$ ) measured during three  
 142 years was 2.3 %. Relative extractable water (REW) in the upper 1.0 m soil layer was calculated using Eq. (4) (Granier,  
 143 1987).

$$144 \quad \text{REW} = \frac{\bar{\theta}_{0-1.0 \text{ m}} - \theta_{min}}{\theta_{fc} - \theta_{min}} \quad (4)$$

145 The more specific classification to quantify the degree of drought at our site is defined in **Table 2**.

146 Groundwater table ( $g_w$ ) was monitored *in situ* manually once per month using a measuring tape with a cone.

147 **Table 2** Classification of soil drought based on relative extractable water (REW) from the measurements and bio-physiological  
 148 traits from preliminary reports in Mongolian Scots pine. The  $T_r$  indicates transpiration rate,  $C_s$  for stomatal conductance and  $C_i$   
 149 for intercellular carbon oxide concentration.

| Parameter | Volumetric soil<br>moisture content (%)                                 | REW                           | Degree of drought | Description of bio-physiological traits                                                                                                      |
|-----------|-------------------------------------------------------------------------|-------------------------------|-------------------|----------------------------------------------------------------------------------------------------------------------------------------------|
| $D_0$     | $\bar{\theta}_{0-1.0 \text{ m}} > 0.4 \theta_{fc}$                      | $\text{REW} > 0.31$           | No drought        | Normal growth                                                                                                                                |
| $D_{mil}$ | $0.3 \theta_{fc} < \bar{\theta}_{0-1.0 \text{ m}} \leq 0.4 \theta_{fc}$ | $0.20 < \text{REW} \leq 0.31$ | Mild drought      | Weak growth (Jiao, 2001); $T_r$ , $C_s$ and $C_i$ decreased by 46.2 %, 33.2 % and 0.9 %, respectively (Zhu et al., 2005; Tang et al., 2015); |
| $D_{mod}$ | $0.2 \theta_{fc} < \bar{\theta}_{0-1.0 \text{ m}} \leq 0.3 \theta_{fc}$ | $0.08 < \text{REW} \leq 0.20$ | Moderate drought  | 30% leaves withered (Zhu et al., 2005); $T_r$ , $C_s$ and                                                                                    |

---

0.3  $\theta_{fc}$

$C_i$  decreased by 62.1 %, 48.6 % and 51.1 %, re-

spectively (Zhu et al., 2005; Tang et al., 2015);

$D_s$

$\bar{\theta}_{0-1.0\text{ m}} \leq 0.2 \theta_{fc}$

REW  $\leq 0.08$

Severely drought

Leaves withered and some of the branch die (Jiao,

2001);  $T_r$ ,  $C_s$  and  $C_i$  decreased by 70.9 %, 77.3 %

and 67.6 %, respectively (Zhu et al., 2005; Tang et

al., 2015)

---

### 150 2.3.3 Sap flux density measurements

151 Sap flux density in the outermost sapwood (0–3 cm depth) ( $J_{s\text{-outter}}$ ,  $\text{cm min}^{-1}$ ) was measured continuously using the Granier-  
152 type thermal dissipation method (Dynamax Inc., Houston. TX. USA). Each probe was installed under the cambium on the  
153 north side of the stem at breast height (1.3 m) with pairs of probes 0.04 m apart vertically. The upper probe included a heater  
154 and the lower probe was unheated and so remained at trunk temperature for reference. Each sensor was carefully removed at  
155 the end of each growing season (in November) and reinstalled at the initial stage in next year (in April). The temperature dif-  
156 ference between the upper (heated) probe and the lower (reference) probe was measured at 1-min intervals, with mean values  
157 recorded at 10-min intervals using SQ2020 data loggers. The sensors were shielded with thick aluminum-faced foam to min-  
158 imize warming by radiation and exposure to rain and physical damage. The Granier empirical equation for  $J_s$  was adopted as  
159 Eq. (5):

$$160 \quad J_{s\text{-outter}} = 119 \times 10^{-4} \left( \frac{\Delta T_0 - \Delta T}{\Delta T} \right)^{1.231} \quad (5)$$

161 where  $\Delta T$  is the actual temperature difference observed between heated and reference probes, and  $\Delta T_0$  is the maximum  $\Delta T$   
162 value when sap flow is close to zero (generally just predawn) determined over about 10 consecutive days by twice linear  
163 regression (Lu et al., 2004; Dang et al., 2014).

164 For the sap flux density at inner part of sapwood (beyond 3 cm depth) ( $J_{s\text{-inner}}$ ) which is much low due to the relative inactivity  
165 of xylem, we adopted a coefficient 0.56 from Scots pine (*P. sylvestris*) (Lu et al., 2004; Nadezhdina et al., 2002) to estimate

166 the sap flux density at inner part of sapwood.

### 167 2.3.4 Calculation of sap flux

168 Volumetric sap flux ( $J_t$ ,  $\text{cm}^3 \text{h}^{-1}$ ) were the product of sap flux density and corresponding sapwood area on hourly scale. At first,  
169 the sap flux density measurements  $J_s$  was converted to a daily base (Eq. (6)). The daily mean  $J_t$  for all measured trees in  
170 experiment area was then used to calculate daily transpiration of the stand (Eq. (7)). Because all trees were at the same age  
171 and regularly-spaced, each tree was assumed to occupy equal ground per sapwood area. Hence, the ground area fraction of  
172 each tree ( $A_{g,i}$ ,  $\text{cm}^2$ ) was approximated as the product of individual sapwood area and the ratio of total stand sapwood area ( $A_{s-}$   
173  $_{\text{stand}}$ ,  $\text{m}^2$ ) divided by total stand ground area ( $A_{g-\text{stand}}$ ,  $\text{m}^2$ ).

$$174 J_{t,ij} = (J_{s-\text{outter},ij} \times A_{s-\text{outter},i} + J_{s-\text{inner},ij} \times A_{s-\text{inner},i}) \times 60 \quad (6)$$

175 and upscaling to stand transpiration ( $T_s$ ,  $\text{mm day}^{-1}$ )

$$176 T_s = \frac{A_{s-\text{stand}}}{A_{g-\text{stand}}} \frac{1}{\sum_{i=1}^n A_{s,i}} \sum_{i=1}^n \sum_{j=1}^{24} J_{t,ij} \quad (7)$$

177 where,

178  $J_{t,ij}$  is hourly sap flux of a tree  $i$  at  $j$  hour of a 24-hour period,  $J_{s-\text{outter},ij}$  is the mean sap flux density in the probe-touched  
179 sapwood of a tree  $i$  at  $j$  hour in a day,  $J_{s-\text{inner},ij}$  is probe-untouched part,  $J_{t,ij}$  is the sap flux of a tree  $i$  at  $j$  hour in a day,  $A_{s-\text{outter},i}$   
180 and  $A_{s-\text{inner},i}$  is sapwood area of the outter 3 cm width and the rest sapwood of tree  $i$ , respectively,  $A_{s,i}$  equals  $A_{s-\text{outter},i}$  and  $A_{s-}$   
181  $_{\text{inner},i}$ ,  $n$  is the numbers of trees measured each year.  $A_{s-\text{stand}}$  is total sapwood area of 25 sample trees ( $\text{m}^2$ ),  $A_{g-\text{stand}}$  is total ground  
182 area of the plot ( $A_{g-\text{stand}}$ ,  $\text{m}^2$ ).

### 183 2.4 Statistical analyses

184 The normalized  $T_s$  dividing by the maximum over the whole experiment period was used for comparison and further analy-  
185 sis. The effect of soil moisture content on normalized  $T_s$  and the ratio  $T_s / \text{ET}_0$  was tested by one-way analysis of variance  
186 (ANOVA) and a Tukey HSD *post hoc* multiple comparisons test using SPSS 20 (SPSS Inc., Chicago, IL, USA). Significant  
187 correlations between normalized  $T_s$  or the ratio  $T_s / \text{ET}_0$  and environmental factors over different periods were determined by

188 Pearson's correction coefficient tests at  $P < 0.05$  or  $0.01$ . The other statistical analyses and plots employed OriginPro 2016  
189 version 9.3 (OriginLan Inc., Northampton, MA, USA).

### 190 3 Results

#### 191 3.1 Seasonal dynamics of normalized $T_s$ and environmental factors

192 The amounts of rainfall during the investigation periods were 554 mm in 2013, 384 mm in 2014 and 408 mm in 2015, indicating  
193 a great variation among years. Meanwhile, rainfall in a year was concentrated over quite short periods (**Fig. 4a**) which also  
194 induced great inter-month variation of water supply in this region.

195 Daily soil moisture content exhibited large variances. The heterogeneity of soil moisture content with soil depth was  
196 significant ( $P < 0.01$ ). In a wet year 2013, soil moisture content was higher than a dry year 2014 (**Fig. 4b**). In the second dry  
197 year 2015, there was a long drought period in July and August. After a heavy rainfall in late August (DOY 231), the soil of  
198 both upper and deep layers were refilled with a high soil moisture content. Based on our classifications (**Table 2**), the days of  
199 moderate and severe drought ( $D_{\text{mod}} + D_s$ ) accounted for 19 %, 34 %, 66 % and 85 % of the whole three-year period for the four  
200 soil layers at 0–0.6, 0.6–1, 1–1.5 and 1.5–2 m, respectively. Thus, for MP it seems be the upper 1.0 m soil layer that provides  
201 the main water source, having the highest levels of soil moisture  $\bar{\theta}_{0-0.6\text{ m}}$  and  $\bar{\theta}_{0.6-1\text{ m}}$ . Intense rainfall that infiltrated to and thus  
202 helped recharge the deeper layers of soil ( $\bar{\theta}_{1.5-2\text{ m}}$ ), were very rare from the later July in 2013 to later August in 2015.

203 There were no significant differences between years for daily  $R_s$  ( $P = 0.4$ ) or daily mean  $D$  ( $P = 0.25$ ) (**Figs. 4c, 4d**). The  
204  $D$  over the whole period never exceeded 2.4 kPa (**Fig. 4d**). The groundwater table ( $g_w$ ) at the start of the experiment was 5.2  
205 m but significantly lowered to 5.6 m at the end of the experiment in 2015 (**Fig. 4e**).

206 The daily normalized  $T_s$  showed similar seasonal patterns with  $R_s$  (**Fig. 4f**), indicating the radiation was a major factor to  
207 affect plant transpiration. Overall, normalized  $T_s$  was at a relative high level in May each year until August, and then gradually  
208 decreased to a low level in late October. The seasonal dynamics of normalized  $T_s$  reflected the variations in physiological traits  
209 of MP and meteorological factors. The normalized  $T_s$  between the years was significantly different ( $P < 0.01$ ). The average  
210 daily normalized  $T_s$  is 0.52 in 2013, decreased by 25 % in 2014 and further by 58 % in 2015. The maximum daily normalized

211  $T_s$  over three years occurred in 2013, the value of the maximum daily normalized  $T_s$  in 2014 and 2015 is 0.68 and 0.58,  
212 respectively. (**Fig. 4f**). The decreasing normalized  $T_s$  between seasons was partially due to less rainfall and soil water availa-  
213 bility, and probably also due to the plant recovery capability in relation to the permanent changes in plant physiological traits.  
214

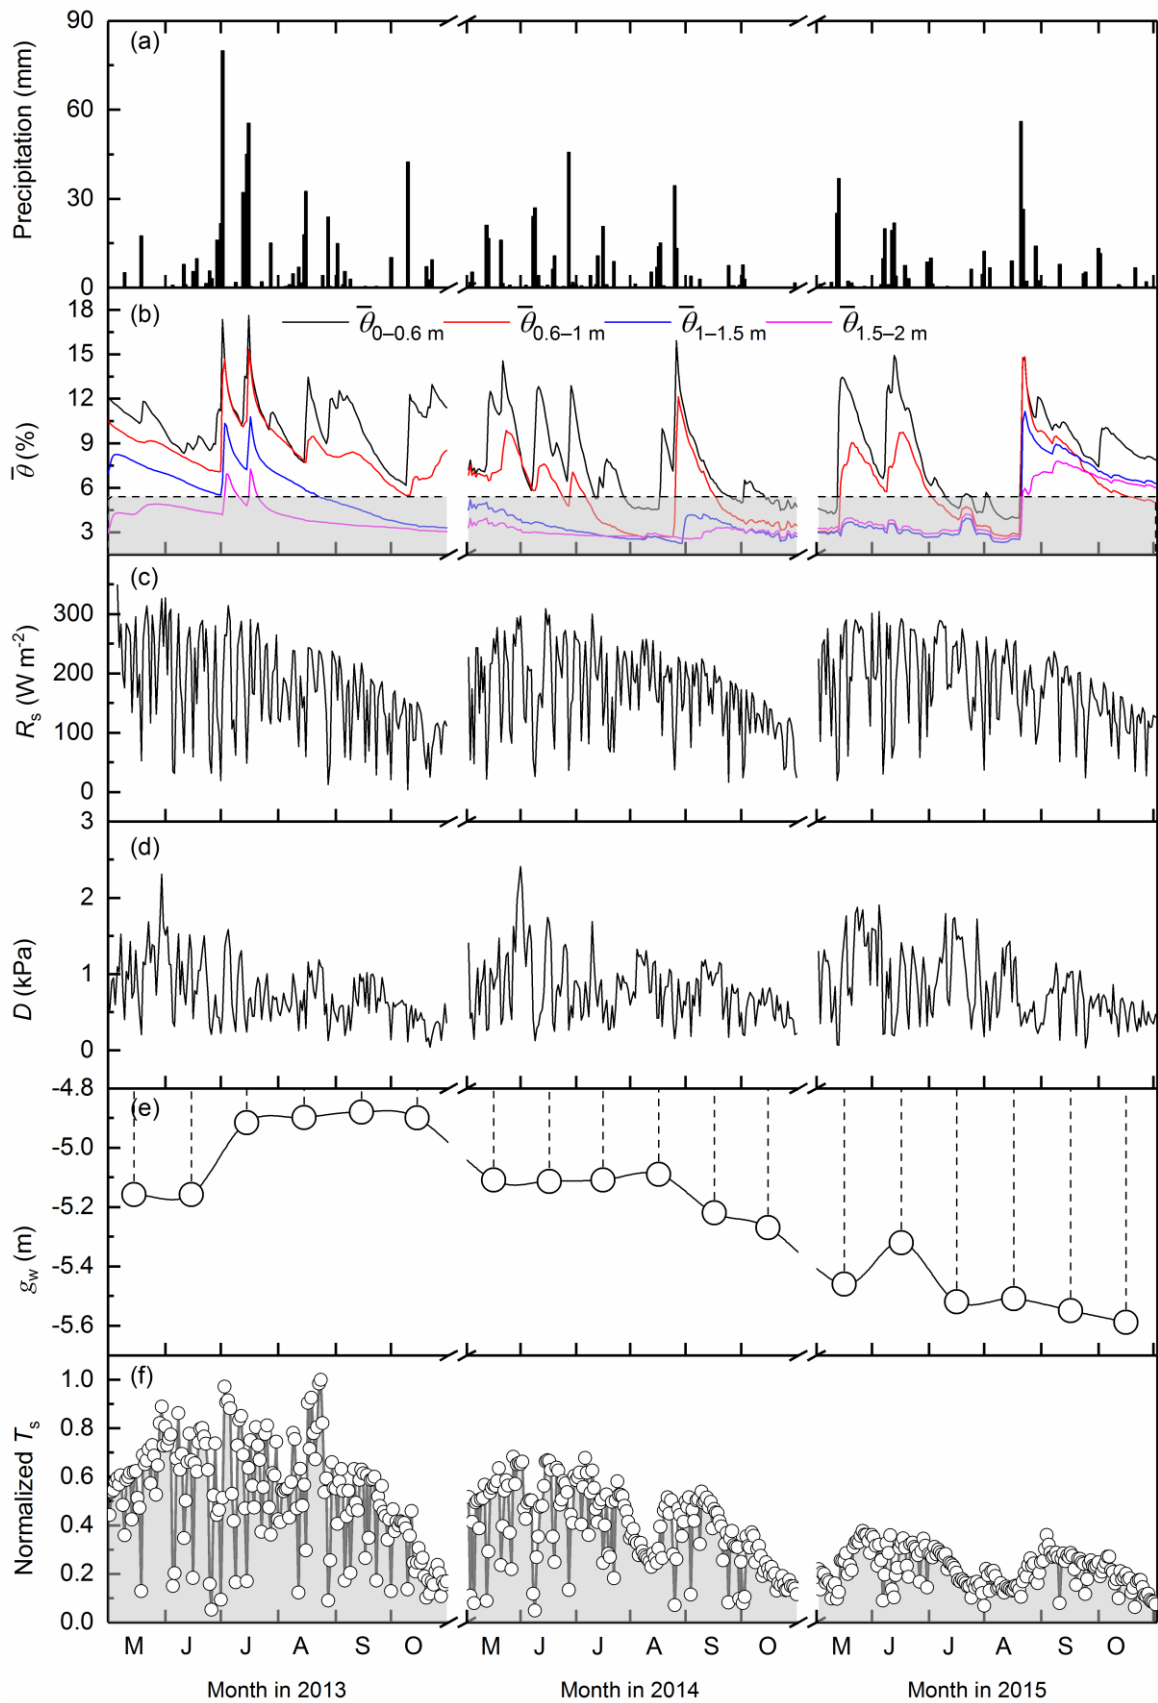

215

216 **Figure 4** Seasonal time courses of precipitation, mean volumetric soil moisture content ( $\bar{\theta}$ ), solar radiation ( $R_s$ ), vapour pressure deficit ( $D$ ),

217 groundwater table ( $g_w$ ), and normalized daily transpiration of stands ( $T_s$ ) dividing by the maximum over the whole experiment period. The

218 grey area in (b) indicates soil moisture under moderate and severe drought condition.

### 219 3.2 Response of transpiration to atmosphere driving and changes with soil drought

220 The ratio  $T_s / ET_0$  was used to reflect the response of transpiration to atmosphere driving. We found that  $T_s / ET_0$  under sufficient water  
221 supply condition ( $D_0$ ) was about  $0.29 \pm 0.09$  (Fig. 5a), 15% higher than under mild drought ( $D_{mil}$ ), 62% higher than under  
222 moderate drought ( $D_{mod}$ ) and 149 % higher than under severe drought ( $D_s$ ). The maximum ratio of daily  $T_s / ET_0$  increased with  
223 REW sharply at low REW but keep constant when the REW was above 0.31 (Fig. 5b). This indicated that there are the other  
224 factors besides the atmospheric and soil moisture affected the sap flux of MP, in which the stomatal regulation or the seasonal  
225 variation of biological rhythms is important one.

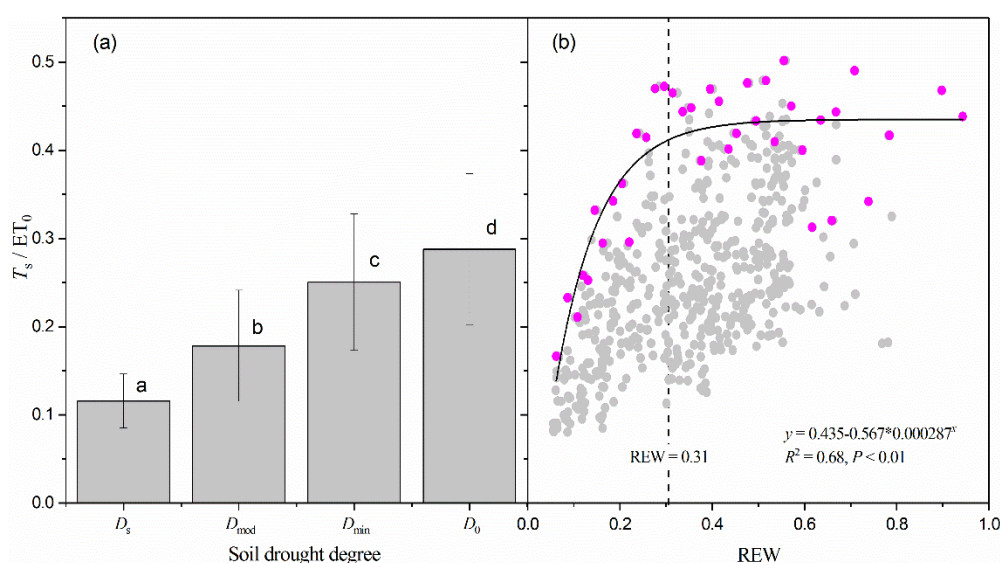

226  
227 **Figure 5** The ratio  $T_s / ET_0$  affected by soil droughts. Normalized sap flux by using reference evapotranspiration indicates a potential tran-  
228 spiration ability under maximum evaporative demand caused by meteorological factors, the relationship between  $T_s / ET_0$  and relative ex-  
229 tractable water (REW) is mainly affected by plant traits. The maximum of  $T_s / ET_0$  at the REW step of 0.02(dimensionless) are selected out  
230 (red circles in (b)) and modelled by an exponential function. The dashed line is at REW=0.31. Values of  $T_s / ET_0$  followed by different letters  
231 are significantly different at  $P < 0.05$  by univariate ANOVA (post hoc Tukey HSD).

### 232 3.3 Progressive decline of normalized $T_s$ with developing of drought and recovery following rain

233 The 49-day periods from DOY 203 to 251 each year was chosen to illustrate the changes in normalized  $T_s$  with REW, a dry-  
234 wet shift. In the period of wet year (2013), the soil moisture is always in  $D_0$  level (without water stress) and mean normalized

235  $T_s$  was about 0.57 (**Fig. 6a**). In the first dry year (2014), normalized  $T_s$  decreased by as much as 18 % under a mild water stress  
 236 ( $D_{mil}$ ) and further by 40 % under moderate stress ( $D_{mod}$ ). The normalized  $T_s$  was greatly recovered after a heavy rain (**Fig. 6b**).  
 237 In the second dry year (2015), the normalized  $T_s$  decreased by 73 % under  $D_{mod}$  and further by 74 % under  $D_s$  stage (**Fig. 6c**).  
 238 The daily normalized  $T_s$  under  $D_s$  was only 0.15. This very little transpiration level likely only sufficient to maintain the  
 239 survival of MP. After a heavy rainfall, even the soil water status was improved a lot, the normalized  $T_s$  of trees was still very  
 240 low (less than 0.38), indicating the  $T_s$  of MP was difficult to be recovered.

241

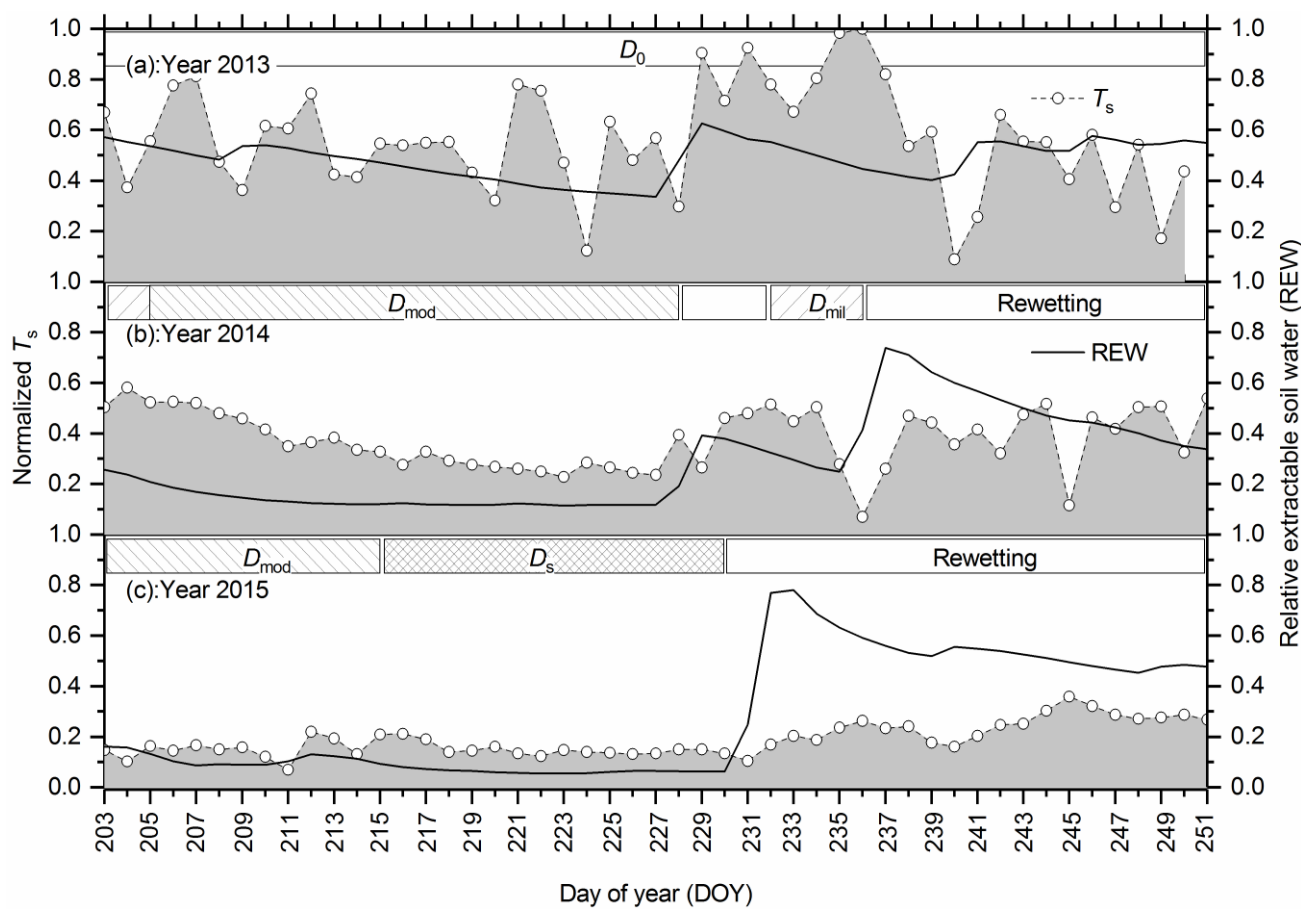

242

243 **Figure 6** The comparison of normalized daily transpiration ( $T_s$ ) and relative extractable water (REW) in the upper soil layer (above 1 m)  
 244 during maximum growth period from DOY 203 to 251 in 2013 to 2015.  $D_0$ ,  $D_{mil}$ ,  $D_{mod}$ , and  $D_s$  are no, mild, moderate and severe droughts  
 245 stage, respectively (see Table 2). The obvious increase of REW was due to the heavy rainfall events which were seen in Fig.4.

## 246 4 Discussion

### 247 4.1 Reduction of soil moisture content under droughts



248 In our site, the long term trends for increasing air temperature and decreasing annual precipitation (**Fig. 2**) is unfavorable to  
 249 the growth of trees. The declining groundwater and the coarse sandy soil (>83 % sand particles in our site) prevented capillary  
 250 ascension efficiently (less than 0.5 m) (Vincke and Thiry, 2008). Sandy soils have low water holding capacity and high hy-  
 251 draulic conductivity, thus water percolates through this soil quickly after a rain. During the three-year periods in our site, there  
 252 are an effective rain event every 14 days averagely (rainfall intensity is more than 10 mm per times). Under well-wetted soil  
 253 conditions ( $D_0$ ),  $\bar{\theta}_{0-1.0\text{ m}}$  was depleted at the high rate of 1.9 vol % per day during the first two days and at the rate of 0.35 vol %  
 254 per day during the subsequent nine days (**Fig. 7**) because of either soil water holding capacity or great water uptake by trees.  
 255 The depleting rate of  $\bar{\theta}_{0-1.0\text{ m}}$  under the drought conditions was only 0.09 vol % per day under severe drought. That indicates  
 256 the only little of water was absorbed by trees under severe water stress. Our results suggested the plant might adjust their  
 257 physiological traits, e.g. closing stomatal and reducing root system to at first priority for the survival. The sap flux declines  
 258 very quickly in desiccated root system (Mereu et al., 2009).

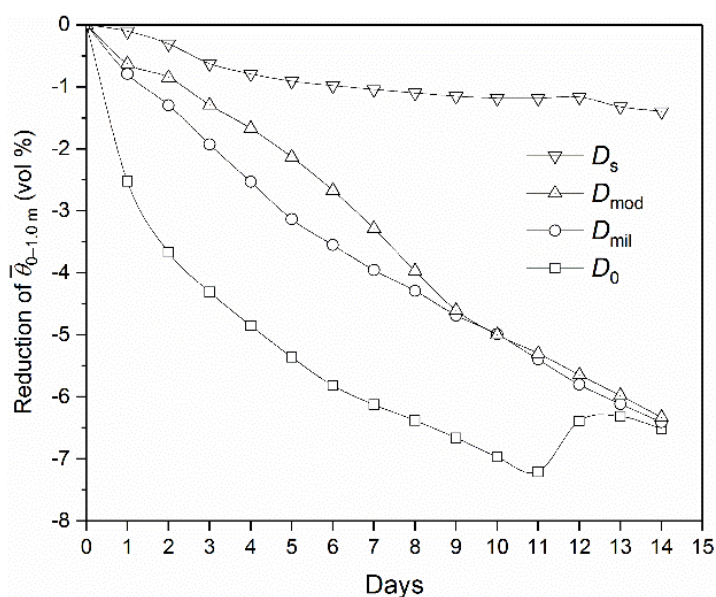

259 **Figure 7** There will be an effective rain event every 14 days averagely in our site (Rainfall intensity is more than 10 mm per times), which  
 260 acted as a window to analyze the decrease rate of soil water during this period. Scatter-line plot described the relationships between decrease  
 261 rate of upper soil moisture ( $\bar{\theta}_{0-1.0\text{ m}}$ ) and time under different initial degree of drought levels which were defined in **Table 2**.

#### 263 4.2 Contribution of water in the upper and deep soil layers

264 The MP is a shallow-rooted species with root density decreasing sharply below 1.0 m (Jiang et al., 2002; Zhu et al., 2005; Zhu  
265 et al., 2008), implying the soil moisture in the upper 1.0 m layer provides major water source for transpiration (Su et al., 2006;  
266 Wei et al., 2013; Song et al., 2014). In our study, the rapid recovery of normalized  $T_s$  when  $\bar{\theta}_{0-1.0\text{ m}}$  was increased after a rain  
267 (**Figs. 4 and 6**) suggested that MP was very sensitive to the changes in the available water in the upper soil layer. Uptake by  
268 the shallow roots decreased very significant as this soil layer dried out (**Fig. 6**). However, under severe drought, for example  
269 in August of 2015, the MP trees used quite amount of deep soil water. It might be carried out by developing more letaral root  
270 system in deep soil. The fine roots of Scots pine die quickly under drought conditions (Vanguelova and Kennedy, 2007).  
271 Therefore, it would cause a death of new developed fine root system, resulting a permanent declining in the capability of  
272 transpiring water even when the soil water status was improved (**Fig. 4**). The death of fine root in deep soil layer may explain  
273 why after a rainfall, post-stress sap flux recovery is very small after a long and severe drought in 2015.

#### 274 **4.3 Groundwater is an important source for plant adaptation under long and severe drought**

275 Mongolian Scots pine is a dimorphic-rooted species where, the maximum taproot depth in a sandy soil can up to 2.7 m (Cana-  
276 dell et al., 1996), and even to 5.2 m for a 42-year-old tree in a sandy soil near our site (Jiang et al., 2002). Our results on the  
277 depletion of soil water in 1.5-2 m soil layers, existed but not large, also suggested a deep taproot depth in MP. The deep taproot  
278 enables trees to use deeper water source (i.e. groundwater), especially under drought (Barbeta et al., 2015; Hentschel et al.,  
279 2016). This is likely to occur when soil moisture content in the upper soil layers (0–60 cm) declines to 3.6 % (Wei et al., 2013;  
280 Song et al., 2016a). In our site,  $g_w$  lowered from  $5.03 \pm 0.14$  m in 2013 to  $5.47 \pm 0.09$  m in 2015 (**Fig. 4e**). From late 2014, the  
281 value of  $g_w$  was always far deeper than 5.2 m and thus unlikely accessible directly by our instrumented trees if their tap roots  
282 were shallower than 5.2 m. However, in the severe drought ( $D_s$ , with minimum  $\bar{\theta}_{0-1.0\text{ m}}$  as low as 2.3 %), we recorded a clear  
283 diurnal pattern of sap flux with the much reduced daily normalized  $T_s$  (0.15, or 28.2 % of that for  $D_0$ ). Hence, we inferred that  
284 significant groundwater contributions to  $T_s$  occurred only under severe drought conditions though determining just what pro-  
285 portion of that water came from the groundwater or from tree storage is beyond the scope of this study. It has been reported

286 that as rainfall decreases, tree dependence on groundwater increases (Kume et al., 2007).

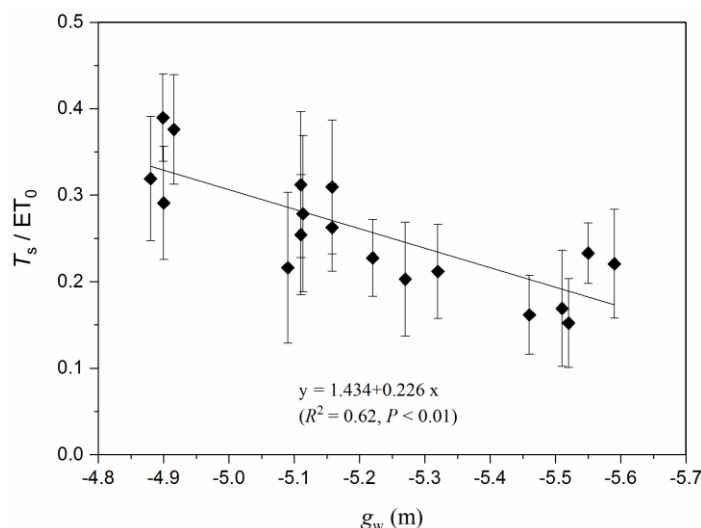

287

288 **Figure 8** The ratio  $T_s/ET_0$  in Mongolian Scots pine decreased with the declining of the groundwater table ( $g_w$ )

#### 289 4.4 Transpiration of the plantation and implications

290 There is a complex interplay between the various meteorological factors, e.g. solar radiation, vapour pressure deficit, air tem-  
291 perature, wind speed and relative humidity, and directly or indirectly influences transpiration in a tree. These variables were  
292 aggregated into a variable  $ET_0$ , which serves as an index of atmospheric water demand power (Allen et al., 1998; Zha et al.,  
293 2010). Therefore, as expected, changes in  $ET_0$  trigger a prompt plant response in terms of transpiration. Changes in precipita-  
294 tion (and hence soil moisture) affect transpiration but likely over a long temporal scale (Yan et al., 2016). Our results also  
295 showed a strong reduction in the ratio  $T_s/ET_0$  mostly after a long period drought. Using normalized transpiration allows to  
296 focus on the effects of soil water availability and plant physiological responses. This behavior has also been found in Scots  
297 pine in Europe (Poyatos et al., 2005), presenting the strong effects of stomatal regulation for controlling the rate of water loss.  
298 The significant fall in  $g_w$  seems to explain the difficulty in plant recovery of  $T_s$  after a heavy rain.

299 Transpiration in a coniferous forest is often conservative with relatively low values of canopy conductance (Levitt, 1980). For  
300 instance, Scots pine has a rather conservative water use strategy with a very plastic response to intermittent dry periods with  
301 high use of stored water (Arneith et al., 2006; Verbeeck et al., 2007). In our study, we found MP was more moderate in its

302 water consumption than many broad-leaved forest tree species growing nearby (e.g. *Populus* spp) (Zhu et al., 2005). Although  
303 the groundwater table decreases in our experiment, the MP still contributes less to the groundwater table decline than the more  
304 extensive and/or intensive agricultural land uses (0.1 m per year) (Song et al., 2016b). The lateral roots of an MP tree can  
305 extend laterally to about 0.65-times tree height (Jiang et al., 2002; Su et al., 2006). This helps MP to obtain water from the  
306 upper soil layers efficiently (Song et al., 2014). However, the ability of MP to maintain the normal water use level decreased  
307 greatly during prolonged severe drought, which implies the limitation of trees to climate change (Waromg et al., 1979), espe-  
308 cially when the extreme weather events increase in the future. Meanwhile, it was reported that the mature period of Mongolian  
309 Scots pine occurred in advance when introduced from the north (origin distribution region) to south (planted region, this study  
310 area) (Jiao et al. 1989; 2001). Therefore, the difficulty in recovery for water uptake by 30 years MP trees under severe drought  
311 might also caused by the low growth vigor of old trees. It implies that the re-forestry might be necessary when MP trees are  
312 over 30 years old in the sandy site.

## 313 **5 Conclusions**

314 The mean stand transpiration of Mongolian Scots pine was high in wet year 2013, but decreased by 25% in dry year 2014 and  
315 further by 58% in second dry year 2015. The high inter-annual as well as the high intra-seasonal variability in precipitation  
316 induced the great fluctuation of soil moisture at the upper soil layer frequently, which brought the great effect on sap flux of  
317 this shallow-rooted species. The daily stand transpiration reduced with drought by as high as 74% as the duration and intensity  
318 of drought was high in dry years. The ability of recovery in plant transpiration following heavy rain, however, was limited  
319 greatly with the duration and severity of drought. Our results suggest that the degradation in MP plantation is attributable to  
320 the combined effects of large temporal variation in rainfall and the ability of specific recovery after the occurrence of drought.  
321 The results could help farmer improve the management and sustainability of MP forestry by optimizing plant density and  
322 reforestation in semi-arid region.

## 323 **Acknowledgements**

324 This work was supported by the Fundamental Research Funds for the Central Non-profit Research Institution of CAF

325 (No.CAFYBB2014MA013), the Major State Basic Research Development Program of China (973 Program) (No.  
326 2013CB429901) and the National Natural Science Foundation of China (No.31570704). We thank Dr. Alexander Lang  
327 for his useful discussions and suggestions. Field support for this research was provided by Zhanggutai National Studies  
328 Station for Desert Ecosystem of China (CDERN).

329 **References**

- 330 Allen, R.G., Pereira, L.S., Raes, D. and Smith, M.: Crop evapotranspiration: Guidelines for computing crop water requirements,  
331 FAO irrigation and drainage paper 56, FAO, Rome, Italy, 1998.
- 332 Arneeth, A., Veenendaal, E.M., Best, C., Timmermans, W., Kolle, O., Montagnani, L. and Shibistova, O.: Water use strategies  
333 and ecosystem-atmosphere exchange of CO<sub>2</sub> in two highly seasonal environments, *Biogeosciences*, 3, 421–437, 2006.
- 334 Barbeta, A., Mejía-Chang, M., Ogaya, R., Voltas, J., Dawson, T.E. and Peñuelas, J.: The combined effects of a long-term  
335 experimental drought and an extreme drought on the use of plant-water sources in a Mediterranean forest, *Global Change*  
336 *Biol.*, 21, 1213–1225, 2015.
- 337 Bovard, B.D., Curtis, P.S., Vogel, C.S., Su, H.B. and Schmid, H.P.: Environmental controls on sap flow in a northern hardwood  
338 forest, *Tree Physiol.*, 25, 31–38, 2005.
- 339 Campbell, G.S. and Norman, J.M.: An introduction to environmental biophysics, Springer, New York, 286 pp, 1998.
- 340 Canadell, J., Jackson, R.B., Ehleringer, J.B., Mooney, H.A., Sala, O.E. and Schulze, E.D.: Maximum rooting depth of vegeta-  
341 tion types at the global scale, *Oecologia*, 108, 583–595, 1996.
- 342 Chirino, E., Bellot, J. and Sanchez, J.R.: Daily sap flow rate as an indicator of drought avoidance mechanisms in five Medi-  
343 terranean perennial species in semi-arid southeastern Spain, *Trees*, 25, 593–606, 2011.
- 344 Dang, H.Z., Zha, T.S., Zhang, J.S., Li, W. and Liu, S.Z.: Radial profile of sap flow velocity in mature Xinjiang poplar (*Populus*  
345 *alba* L. var. *pyramidalis*) in Northwest China, *J. Arid Land*, 6, 612–627, 2014.
- 346 D'Odorico, P. and Porporato, A.: Soil moisture dynamics in water-limited ecosystems, *Ecohydrology*, Dryland, Springer, Neth-  
347 erlands, 31–46, 2006.
- 348 Granier, A.: A new method of sap flow measurement in tree stems, *Annales Des Sciences Forestieres*, 42, 193–200, 1985.
- 349 Granier, A.: Evaluation of transpiration in a Douglas-fir stand by means of sap flow measurements, *Tree Physiol.*, 3, 309–320,  
350 1987.
- 351 Hentschel, R., Hommel, R., Poschenrieder, W., Grote, R., Holst, J., Biernath, C., Gessler, A. and Priesack, E.: Stomatal con-  
352 ductance and intrinsic water use efficiency in the drought year 2003: a case study of European beech, *Trees*, 30, 153–174,

353 2016.

354 IPCC: Climate change 2007: the scientific basis, <http://www.ipcc.ch/>, last access: 28 February 2017.

355 Jiang, F.Q., Cao, C.Y., Zeng, D.H., Guan, W.B., Wu, X.Y. and Zheng, Y.R.: Degradation and restoration of ecosystems on  
356 Keerqin Sandy Land, Chinese Forestry Press, Beijing, 282 pp, 2002 (in Chinese).

357 Jiao, S.R.: Structure and function of forestry ecosystem for sand-fixation in Zhanggutai area, Liaoning Science and Technology  
358 Press, Shenyang, 114 pp, 1989 (in Chinese).

359 Jiao, S.R.: Report on the causes of the early decline of *Pinus sylvestris* var. *mongolica* shelterbelt and its preventative and  
360 control measures in Zhanggutai of Liaoning Province, *Scientia Silvae Sinicae*, 37, 131–138, 2001 (in Chinese with Eng-  
361 lish abstract).

362 Kume, T., Takizawa, H., Yoshifuji, N., Tanaka, K., Tantasirin, C., Tanaka, N. and Suzuki, M.: Impact of soil drought on sap  
363 flow and water status of evergreen trees in a tropical monsoon forest in northern Thailand, *Forest Ecol. Manag.*, 238,  
364 220–230, 2007.

365 Leo, M., Oberhuber, W., Schuster, R., Grams, T.E.E., Matyssek, R. and Wieser, G.: Evaluating the effect of plant water avail-  
366 ability on inner alpine coniferous trees based on sap flow measurements, *Eur. J. Forest Res.*, 133, 691–698, 2013.

367 Levitt, J.: Responses of plants to environmental stresses, Academic Press, New York, USA, 256 pp, 1980.

368 Lu, P., Urban, L. and Zhao, P.: Granier's thermal dissipation probe (TDP) method for measuring sap flow in trees: theory and  
369 practice, *Acta Botanica Sinica*, 46, 631–646, 2004.

370 Meinzer, F.C., Brooks, J.R., Domec, J.C., Gartner, B.L., Warren, J.M., Woodruff, D.R., Bible, K. and Shaw, D.C.: Dynamics  
371 of water transport and storage in conifers studied with deuterium and heat tracing techniques, *Plant, Cell and Environment*,  
372 29, 105–114, 2006.

373 Mereu, S., Salvatori, E., Fusaro, L., Gerosa, G., Muys, B. and Manes, F.: An integrated approach shows different use of water  
374 resources from Mediterranean maquis species in a coastal dune ecosystem, *Biogeosciences*, 6, 2599–2610, 2009.

375 Nadezhdina, N., Cermak, J. and Ceulemans, R.: Radial patterns of sap flow in woody stems of dominant and understory species:  
376 scaling errors associated with positioning of sensors, *Tree Physiol.*, 22, 907–918, 2002.

- 377 Poyatos, R., Llorens, P. and Gallart, F.: Transpiration of montane *Pinus sylvestris* L. and *Quercus pubescens* Willd. forest  
378 stands measured with sap flow sensors in NE Spain., *Hydrol. Earth Syst. Sc.*, 9, 493–505, 2005.
- 379 Song, L.N., Zhu, J.J., Li, M.C. and Yu, Z.Y.: Water utilization of *Pinus sylvestris* var. *mongolica* in a sparse wood grassland  
380 in the semiarid sandy region of Northeast China, *Trees*, 28, 971–982, 2014.
- 381 Song, L.N., Zhu, J.J., Li, M.C., Zhang, J.X. and Lv, L.Y.: Sources of water used by *Pinus sylvestris* var. *mongolica* trees based  
382 on stable isotope measurements in a semiarid sandy region of Northeast China, *Agr. Water Manage.*, 164, 281–290, 2016a.
- 383 Song, L.N., Zhu, J.J., Li, M.C. and Zhang, J.X.: Water use patterns of *Pinus sylvestris* var. *mongolica* trees of different ages  
384 in a semiarid sandy lands of Northeast China, *Environ. Exp. Bot.*, 129, 94–107, 2016b.
- 385 Su, F.L., Liu, M.G., Guo, C.J. and Zhang, Q.: Characteristics of vertical distribution of root system of Mongolian scots pine  
386 growing in sandy area and influence to the soil, *Soil and Water Conservation in China*, 286, 20–23, 2006 (in Chinese with  
387 English abstract).
- 388 Su, H., Li, Y.G., Liu, W., Xu, H. and Sun, O.J.: Changes in water use with growth in *Ulmus pumila* in semiarid sandy land of  
389 northern China, *Trees*, 28, 41–52, 2014.
- 390 Tang, F.D., Lin, Y. and Li, Y.: Impact of water stress photosynthesis characteristics of Mongolian pine seedlings and Grafting  
391 Korean pine seedlings with stocks of Mongolian pine, *Journal of Liaoning University*, 42, 274-276, 2015 (in Chinese  
392 with English abstract).
- 393 Vangelova, E.I. and Kennedy, F.: Morphology, biomass and nutrient status of fine roots of Scots pine (*Pinus sylvestris*) as  
394 influenced by seasonal fluctuations in soil moisture and soil solution chemistry, *Plant Soil*, 270, 233–247, 2007.
- 395 Verbeeck, H., Steppe, K., Nadezhdina, N., De Beeck, M.O., Deckmyn, G., Meiresonne, L., Lemeur, R., Cermak, J., Ceulemans,  
396 R. and Janssens, I.A.: Model analysis of the effects of atmospheric drivers on storage water use in Scots pine, *Biogeosci-*  
397 *ences*, 4, 657–671, 2007.
- 398 Vincke, C. and Thiry, Y.: Water table is a relevant source for water uptake by a Scots pine (*Pinus sylvestris* L.) stand: Evidences  
399 from continuous evapotranspiration and water table monitoring, *Agr. Forest Meteorol.*, 148, 1419–1432, 2008.
- 400 Waromg, R.H., Whitehead, D. and Jarvis, P.G.: The contribution of stored water to transpiration in Scots pine, *Plant, Cell &*



- 401 Environment, 2, 309–317, 1979.
- 402 Wei, Y.F., Fang, J., Liu, S., Zhao, X.Y. and Li, S.G.: Stable isotopic observation of water use sources of *Pinus sylvestris* var.  
403 *mongolica* in Horqin Sandy Land, China, *Trees*, 27, 1249–1260, 2013.
- 404 Wesche, K., Walther, D., Wehrden, H.V. and Hensen, I.: Trees in the desert: Reproduction and genetic structure of fragmented  
405 *Ulmus pumila* forests in Mongolian drylands, *Flora*, 206, 91–99, 2011.
- 406 Yan, M.J., Zhang, J.G., He, Q.Y., Shi, W.Y., Otsuki, K., Yamanaka, N. and Du, S.: Sapflow-based stand transpiration in a  
407 semiarid natural oak forest on China's Loess Plateau, *Forests*, 7, 227–240, 2016.
- 408 Yuan, M.W., Zhang, L.Z., Gou, F., Su, Z., Spiertz, J.H.J., van der Werf, W.: Assessment of crop water productivity in semi-  
409 arid Inner Mongolia. *Agr. Water Manage.*, 122, 28–38, 2013.
- 410 Zha, T.S., Barr, A.G., Kamp, G.V.D., Black, T.A., Mccaughey, J.H. and Flanagan, L.B.: Interannual variation of evapotran-  
411 spiration from forest and grassland ecosystems in western Canada in relation to drought, *Agr. Forest Meteorol.*, 150,  
412 1476–1484, 2010.
- 413 Zheng, X., Zhu, J.J., Yan, Q.L. and Song, L.N.: Effects of land use changes on the groundwater table and the decline of *Pinus*  
414 *sylvestris* var. *mongolica* plantations in southern Horqin Sandy Land, Northeast China, *Agr. Water Manage.*, 109, 94–  
415 106, 2012.
- 416 Zhu, J. J., Li, F.Q., Xu, M.L., Kang, H.Z. and Wu, X.Y.: The role of ectomycorrhizal fungi in alleviating pine decline in  
417 semiarid sandy soil of northern China: an experimental approach, *Ann. Forest Sci.*, 65, 304, 2008.
- 418 Zhu, J.J., Kang, H.Z., Li, Z.H., Wang, G.C. and Zhang, R.S.: Impact of water stress on survival and photosynthesis of Mongolian  
419 pine seedlings on sandy land, *Acta Ecologica Sinica*, 25, 2527–2533, 2005 (in Chinese with English abstract).
- 420 Zhu, J.J., Zeng, D.H., Kang, H.Z., Wu, X.Y. and Fan, Z.P.: Decline of *Pinus sylvestris* var. *mongolica* plantations on Sandy  
421 Land, Chinese Forestry Press, Beijing, 264 pp, 2005 (in Chinese with English abstract).
